# Supplementary material for: Nitrogen availability controls plant carbon storage with warming
Source: Research Square preprint supplement (doi:10.21203/rs.3.rs-432920/v1), 2021-04-28
Supplement: Supplementary file 1 [file 17e8b5692a7d338d3c183e2c.xlsx]

## Sheet: All data
Study	Reference NO.	Experiment name	Treatment	Nitrogen	Tdelta	Note (temperature type)	Long	Lat	MAP	MAT	SCN	Source	Ecosystems	Warming method	Vegetation type	Total-Biomass.control	Csd	Total-Biomass.warmed	Tsd	n	RR	Variance (v)		Aboveground -Biomass.control	Csd	Aboveground-Biomass.warmed	Tsd	n	RR	Variance (v)		Belowground-Biomass.control	Csd	Belowground-Biomass.warmed	Tsd	n	RR	Variance (v)		Root/shoot.Control	CSD	Root/shoot.Warming	TSD	n	RR	Variance (v)	Note	Duration	Source
Jarvi and Burton 2013	1	Ford Forestry Center, Michigan Technological University		n	4.9	soil temperature	-88.48	46.64	879	4.4	5.3	SoilGrids2	Forest	Infrared heater	Woody																	344	30	370	126	4	0.0728613	0.0308933									Fine root biomass	1.6	Jarvi et al., Tree Physiology, 949-959
Jarvi and Burton 2013	1	Ford Forestry Center, Michigan Technological University	+h2o	n	4.9	soil temperature	-88.48	46.64	1142.7	4.4	5.3	SoilGrids2	Forest	Infrared heater	Woody																	391	58	389	178	4	-0.00512822	0.0578467									Fine root biomass	1.6	Jarvi et al., Tree Physiology, 949-959
Saleska et al. 2002	2			n	0.825	soil temperature	-106.989	38.9572	519	0.5	12.1109	Shaw et al., 2001, Global Change Biology, 193-210, Table 1	Grassland	Infrared heater	Herb	255	25.5	224	22.4	5	-0.129617	0.004		105	3	104	10	5	-0.00956945	0.00201238		150	40	120	50	5	-0.223144	0.0489444		1.42857	0.0840169	1.15385	0.427617	5	-0.213574	0.0281609	Deschampsia +Fine root biomass	5	Saleska et al.,2002,Global Biogeochemical Cycles,doi:10.1029/2001GB001573
Zhang et al. 2015	3	Songnen Grassland Ecological Research Station		n	1.75	soil temperature	123.75	44.75	400	5.2	8.54459	Zhang Nanyi's Phd diseteration.2013	Grassland	Infrared heater	Herb	305.853	37.5316	247.893	42.2216	6	-0.210109	0.00734459		282.313	37.4922	221.088	41.658	6	-0.244453	0.00885663		21.7544	1.71881	23.1579	6.87572	6	0.0625199	0.0157326		0.0770578	0.264389	0.104745	0.351648	6	0.306973	3.84046	data taken from 2009	3.3	Zhang et al., 2015, Plos One, DOI:10.1371/journal.pone.0123160.
Zhang et al. 2015	3	Songnen Grassland Ecological Research Station	+N	y	0.58	soil temperature	123.75	44.75	400	5.2	7.31239	Zhang Nanyi's Phd diseteration.2013	Grassland	Infrared heater	Herb	335.857	16.7001	351.399	119.642	6	0.0452389	0.0197324		309.541	15.5788	324.382	119.444	6	0.0468313	0.02302		26.3158	6.01619	27.0175	6.87596	6	0.0263153	0.0195059		0.0850156	0.111951	0.0832891	0.447613	6	-0.020516	5.10269	data taken from 2009	3.3	Zhang et al., 2015, Plos One, DOI:10.1371/journal.pone.0123160. Figure 6
Björk et al. 2007 (site 1)	4	Latnjajaure		n	2.5	soil temperature	18.82	68.35	390	-0.1	18.5	Bjork et al., 2007, New Phytologist, 862-873, Table 1	Shrubland	Passive	Woody																	163.2	16.32	225	22.5	4	0.321124	0.005									dry heath	10.2	Bjork et al., 2007, New Phytologist, 862-873
Björk et al. 2007 (site 2)	4	Latnjajaure		n	2.5	soil temperature	18.82	68.35	390	-0.1	18	Bjork et al., 2007, New Phytologist, 862-873, Table 1	Grassland	Passive	Herb																	446.1	44.61	471.9	47.1	4	0.056224	0.00499047									dry meadow	10.2	Bjork et al., 2007, New Phytologist, 862-873
Rinnan et al. 2008	5	Close to Abisko Scientific Research Station		n	3.5	soil temperature	20.82	68.35	463.95	-2.7	24.5	Rinnan et al., 2008, Applied soil ecology, 271-281, Table 2	Shrubland	Passive	Woody																	17.31	8.1813	19.71	7.2015	6	0.129842	0.0594801										7	Rinnan et al., 2008, Applied soil ecology, 271-281
Rinnan et al. 2008	5	Close to Abisko Scientific Research Station	+litter	n	3.5	soil temperature	20.82	68.35	463.95	-2.7	24.5	Rinnan et al., 2008, Applied soil ecology, 271-281, Table 2	Shrubland	Passive	Woody																	17	8.57321	18.9	8.40175	6	0.105949	0.0753231										7	Rinnan et al., 2008, Applied soil ecology, 271-281
Graham et al. 2014	6	Cass Warming Experiment		n	3	soil temperature	171.75	-43.03	1300	10	13.2424	Graham et al., 2014, Plos One.doi:10.1371/journal.pone.0091204, Table 1	Grassland	Cable	Herb																	389	114.039	454	60.3738	5	0.154518	0.0207255										3	Graham et al., 2014, Plos One.doi:10.1371/journal.pone.0091204
Graham et al. 2014	6	Cass Warming Experiment	+N	y	3	soil temperature	171.75	-43.03	1300	10	12.5429	Graham et al., 2014, Plos One.doi:10.1371/journal.pone.0091204, Table 1	Grassland	Cable	Herb																	518	185.594	482	67.082	5	-0.0720311	0.0295481										3	Graham et al., 2014, Plos One.doi:10.1371/journal.pone.0091204
Cowles et al. 2016	7	BAC Experiment		n	1.5	soil temperature	-93.17	45.58	799	6.8	13	Craine et al.,2002, Biogeochemistry,303-313, Table 1	Grassland	Infrared heater	Herb									114.151	57.1904	196.698	142.976	3	0.544149	0.259787																	1 species	5	Cowles et al., 2016, Global Change Biology, 741-749, Figure 3
Cowles et al. 2016	7	BAC Experiment		n	3	soil temperature	-93.17	45.58	799	6.8	13	Craine et al.,2002, Biogeochemistry,303-313, Table 2	Grassland	Infrared heater	Herb									114.151	57.1904	142.453	44.9353	3	0.221489	0.116837																	1 species	5	Cowles et al., 2016, Global Change Biology, 741-749, Figure 3
Cowles et al. 2016	7	BAC Experiment		n	1.5	soil temperature	-93.17	45.58	799	6.8	13	Craine et al.,2002, Biogeochemistry,303-313, Table 3	Grassland	Infrared heater	Herb									253.302	77.6155	309.906	69.4454	3	0.201686	0.0480348																	4 species	5	Cowles et al., 2016, Global Change Biology, 741-749, Figure 3
Cowles et al. 2016	7	BAC Experiment		n	3	soil temperature	-93.17	45.58	799	6.8	13	Craine et al.,2002, Biogeochemistry,303-313, Table 4	Grassland	Infrared heater	Herb									253.302	77.6155	411.321	89.8706	3	0.484791	0.0472097																	4 species	5	Cowles et al., 2016, Global Change Biology, 741-749, Figure 3
Cowles et al. 2016	7	BAC Experiment		n	1.5	soil temperature	-93.17	45.58	799	6.8	13	Craine et al.,2002, Biogeochemistry,303-313, Table 5	Grassland	Infrared heater	Herb									420.755	77.6155	500.943	85.7855	3	0.174443	0.021118																	16 species	5	Cowles et al., 2016, Global Change Biology, 741-749, Figure 3
Cowles et al. 2016	7	BAC Experiment		n	3	soil temperature	-93.17	45.58	799	6.8	13	Craine et al.,2002, Biogeochemistry,303-313, Table 6	Grassland	Infrared heater	Herb									420.755	77.6155	564.623	85.7855	3	0.294108	0.0190374																	16 species	5	Cowles et al., 2016, Global Change Biology, 741-749, Figure 3
Cowles et al. 2016	7	BAC Experiment		n	1.5	soil temperature	-93.17	45.58	799	6.8	13	Craine et al.,2002, Biogeochemistry,303-313, Table 1	Grassland	Infrared heater	Herb	414.011	85.8288	541.187	98.1284	3	0.267871	0.0252849										335.366	84.4903	432.927	84.4903	3	0.255347	0.0338529									1 species	2.5	Cowles et al., 2016, Global Change Biology, 741-749, Figure 3
Cowles et al. 2016	7	BAC Experiment		n	3	soil temperature	-93.17	45.58	799	6.8	13	Craine et al.,2002, Biogeochemistry,303-313, Table 2	Grassland	Infrared heater	Herb	414.011	85.8288	562.697	171.568	3	0.306848	0.0453145										335.366	84.4903	439.024	126.735	3	0.269333	0.0489348									1 species	2.5	Cowles et al., 2016, Global Change Biology, 741-749, Figure 3
Cowles et al. 2016	7	BAC Experiment		n	1.5	soil temperature	-93.17	45.58	799	6.8	13	Craine et al.,2002, Biogeochemistry,303-313, Table 3	Grassland	Infrared heater	Herb	730.181	196.123	1098	355.346	3	0.407949	0.0589601										493.902	168.981	804.878	337.961	3	0.488353	0.097788									4 species	2.5	Cowles et al., 2016, Global Change Biology, 741-749, Figure 3
Cowles et al. 2016	7	BAC Experiment		n	3	soil temperature	-93.17	45.58	799	6.8	13	Craine et al.,2002, Biogeochemistry,303-313, Table 4	Grassland	Infrared heater	Herb	730.181	196.123	1183.11	220.588	3	0.482606	0.0356352										493.902	168.981	780.488	221.787	3	0.457581	0.0659349									4 species	2.5	Cowles et al., 2016, Global Change Biology, 741-749, Figure 3
Cowles et al. 2016	7	BAC Experiment		n	1.5	soil temperature	-93.17	45.58	799	6.8	13	Craine et al.,2002, Biogeochemistry,303-313, Table 5	Grassland	Infrared heater	Herb	1661.91	232.887	1746.71	306.416	3	0.0497671	0.0168037										1268.29	221.787	1378.05	316.839	3	0.0829969	0.027814									16 species	2.5	Cowles et al., 2016, Global Change Biology, 741-749, Figure 3
Cowles et al. 2016	7	BAC Experiment		n	3	soil temperature	-93.17	45.58	799	6.8	13	Craine et al.,2002, Biogeochemistry,303-313, Table 6	Grassland	Infrared heater	Herb	1661.91	232.887	1555.93	220.543	3	-0.0658912	0.0132428										1268.29	221.787	1128.05	168.981	3	-0.117182	0.0176731									16 species	2.5	Cowles et al., 2016, Global Change Biology, 741-749, Figure 3
Li et al. 2013	8	Duolun County		n	1.79	soil temperature	116.28	42.03	382.3	2.1	9.48	SHEN Rui-Chang et al., 2014.Pedosphere 24(4): 427–436	Grassland	Infrared heater	Herb	1092.63	422.241	991.79	303.467	3	-0.0968315	0.0809874		120.75	11.65	116.54	13.86	3	-0.0354877	0.00781753		971.88	422.08	875.25	303.15	3	-0.104723	0.102858		8.0487	0.244717	7.5103	0.366208	3	-0.069235	0.00110068	data taken from 2010	3.5	Qi Li et al., 2013, Plos one, e60441
Li et al. 2013	8	Duolun County	+N	y	1.79	soil temperature	116.28	42.03	382.3	2.1	8.94	SHEN Rui-Chang et al., 2014.Pedosphere 24(4): 427–436	Grassland	Infrared heater	Herb	1326.32	269.846	1120.84	295.626	3	-0.16833	0.0369866		126.74	5.97	142.89	11.29	3	0.119937	0.00282056		1199.58	269.78	977.95	295.41	3	-0.204268	0.0472749		9.46489	0.119617	6.84408	0.312233	3	-0.324206	0.000746996	data taken from 2011	3.5	Qi Li et al., 2013, Plos one, e60442
Lin et al. 2011	9	HBAMERS		n	1.5	soil temperature	101.3	37.6	561	-1.7	12.5	Yang X.2014. Disertation for Chinese Academy of Science, Table 2.1	Grassland	Infrared heater	Herb	3501.19	356.348	4318.5	395.899	6	0.209806	0.00312722		294.404	12.01	344.349	12.0073	6	0.156702	0.000480011		3239.1	356.146	4240.71	395.717	6	0.269437	0.00346616		10.7508	0.117834	11.4847	0.0996161	6	0.0660407	3.25612e-05	TGB caluated from 2006, BGB taken from 2009	3	Lin et al., 2011.Agricultural and Forest Meteorology,792-802.
Lin et al. 2011	9	HBAMERS	+grazing	n	1.5	soil temperature	101.3	37.6	561	-1.7	12.5	Yang X.2014. Disertation for Chinese Academy of Science, Table 2.2	Grassland	Infrared heater	Herb	3447.79	376.901	3890.08	396.445	6	0.120695	0.00372269		192.54	27.0136	222.87	24.0146	6	0.146286	0.0052158		3400.65	375.931	2907.92	395.717	6	-0.156529	0.00512319		16.8102	0.372419	16.3232	0.173577	6	-0.0293989	0.000100648	TGB caluated from 2006, BGB taken from 2009	3	Lin et al., 2011.Agricultural and Forest Meteorology,792-802.
Noh et al. 2016	10	Tomakomai experimental forest		n	4.03	soil temperature	141.6	42.7	1450	6.3	13.9	Noh et al., 2016, Ecosystems, 504-520, Table 1	Forest	Passive	Woody																	96.9	33.4286	99.2	33.6018	3	0.0234585	0.0779159									Fine root biomass	6	Noh et al., 2016, Ecosystems, 504-520
Xu et al. 2012	11	Miyaluo		n	0.6	soil temperature	102.58	31.58	790	8.9	17.3	Xu et al., 2012, Environmental and Experimental Botany 1-11	Forest	Passive	Woody	1.30262	0.117044	1.50797	0.133618	6	0.146386	0.00265415		1.02583	0.133784	1.20255	0.089217	6	0.158942	0.00375205		0.280382	0.0334253	0.318577	0.0167126	6	0.127709	0.00282731		0.273323	0.16329	0.264918	0.0908637	6	-0.0312331	0.0790934	Plantation-2 year	1	Xu et al., 2012, Environmental and Experimental Botany 1-11
Xu et al. 2012	11	Miyaluo		n	0.6	soil temperature	102.58	31.58	790	8.9	17.3	Xu et al., 2012, Environmental and Experimental Botany 1-11	Forest	Passive	Woody	11.2701	0.989282	12.9479	0.890128	6	0.138784	0.00207189		9.37339	0.841678	10.603	1.08793	6	0.123266	0.0030985		2.01049	0.197556	2.25399	0.296709	6	0.114325	0.00449733		0.214489	0.150998	0.21258	0.166902	6	-0.00894181	0.185338	Plantation-8 year	1	Xu et al., 2012, Environmental and Experimental Botany 1-11
Xu et al. 2012	11	Miyaluo		n	0.6	soil temperature	102.58	31.58	790	8.9	15.16	Xu et al., 2012, Environmental and Experimental Botany 1-11	Forest	Passive	Woody	1.43123	0.120232	1.71496	0.114741	6	0.180861	0.00192224		1.11787	0.103812	1.36841	0.120245	6	0.20222	0.00272425		0.315092	0.0382514	0.336548	0.0328003	6	0.0658766	0.00403934		0.281867	0.199443	0.245941	0.131226	6	-0.136344	0.130893	Natural forest-2year	1	Xu et al., 2012, Environmental and Experimental Botany 1-11
Xu et al. 2012	11	Miyaluo		n	0.6	soil temperature	102.58	31.58	790	8.9	15.16	Xu et al., 2012, Environmental and Experimental Botany 1-11	Forest	Passive	Woody	12.215	0.924681	13.9701	0.827262	6	0.134258	0.00153954		10.0093	0.535374	11.4689	0.632916	6	0.136121	0.000984399		2.20566	0.389307	2.50125	0.194346	6	0.125761	0.00619845				0.21809	0.0953031	6			Natural forest-8year	1	Xu et al., 2012, Environmental and Experimental Botany 1-11
Wang et al. 2014	12	Haibei Station		n	1	soil temperature	101.17	31.44	450	-3	8.08	Wang et al., 2014, Soil Biogeocheistry and Biology, 140-142, Table 1	Grassland	Passive	Herb	211.21	23.5151	220.25	17.8568	6	0.0419104	0.00316145																										10	Wang et al., 2014, Soil Biogeocheistry and Biology, 140-142
Cheng et al. 2013	13	Hydraulic Technique		y	1.77	soil temperature	121.12	32.2	1044.7	17.7	9.49	Cheng et al., 2013. Ecological Research, 959-967, Table 1	Cropland	Infrared heater	Herb	1687.87	91.5925	1643.68	54.1447	3	-0.0265273	0.00134327		1504.35	90.3611	1452.17	45.1892	3	-0.0353019	0.00152545		183.519	14.9684	191.513	29.8259	3	0.0426375	0.0103023		0.121992	0.262177	0.131881	0.158817	3	0.0779394	2.02298		3	Cheng et al., 2013. Ecological Research, 959-967, Figure 3 &5
Cheng et al. 2013	13	Hydraulic Technique		y	1.555	soil temperature	121.12	32.2	1044.7	17.7	9.49	Cheng et al., 2013. Ecological Research, 959-967, Table 1	Cropland	Infrared heater	Herb	1101.99	136.37	1196.61	47.5918	3	0.0823798	0.0056319		1043.48	135.55	1095.65	45.1892	3	0.0487865	0.00619188		58.5083	14.9315	100.964	14.9303	3	0.545595	0.0289987		0.0560704	0.146589	0.0921499	0.153521	3	0.496809	3.20349		3	Cheng et al., 2013. Ecological Research, 959-967, Figure 3 &5
Peng et al. 2015	14	QTP		n	2.32	soil temperature	92.92	34.82	291	-3.8	12	Xue et al., 2015, Ecology and Evolution, 4063-4078, Figure 5	Grassland	Infrared heater	Herb																	3.30811	0.224699	3.78378	0.262163	3	0.134346	0.00313806										1.9	Peng et al., 2015, European Journal of Soil Science, 145-154, Figure 8
Yin et al. 2013	15	Maoxian Ecological Station		n	3.6	soil temperature	103.9	31.7	920	8.9	17.5	Yin et al., 2012, Soil Biogeochemistry and Biology, 77-84, Table 1	Forest	Infrared heater	Woody																	46.6	13.4715	53.5846	12.83	5	0.139661	0.0281802		0.437717	0.0521092	0.461538	0.0595533	5	0.0529925	0.00616433	Taken from A. faxoniana	3	Yin et al., 2013, Agricultural and Forest Meteorology, 180 , 287-296
Yin et al. 2013	15	Maoxian Ecological Station		n	3.6	soil temperature	103.9	31.7	920	8.9	17.5	Yin et al., 2012, Soil Biogeochemistry and Biology, 77-84, Table 1	Forest	Infrared heater	Woody																	53.4513	14.1131	69.6952	16.0374	5	0.26536	0.024533		0.451117	0.0491315	0.534491	0.0327543	5	0.16959	0.0031234	Taken from P. asperata	3	Yin et al., 2013, Agricultural and Forest Meteorology, 180 , 287-296
Pendall et al. 2011	16	TasFACE		n	0.16	soil temperature	147.27	-42.7	560	11.6	14.5	Pendall et al., 2012, Global Change Biology,505–514,Figure 3	Grassland	Infrared heater	Herb	931.723	196.447	808.891	370.961	3	-0.141371	0.0849242		221.279	13.9794	208.348	216.927	3	-0.0602146	0.362681		710.444	195.949	600.543	300.923	3	-0.168056	0.109053		3.21063	0.257859	2.8824	1.15548	3	-0.107841	0.0557168		3	Pendall et al., 2012, Global Change Biology,505–514, Figure 2
Yin et al. 2008	17	Lixian Station		n	0.37	soil temperature	102.583	31.58	850	8	17.5	Yin et al., 2008, Ecological research,23: 459–469	Forest	Passive	Woody	0.46	0.0761577	0.71	0.0894427	8	0.434038	0.00541001		0.34	0.07	0.49	0.08	8	0.36546	0.00863039		0.12	0.03	0.22	0.04	8	0.606136	0.0119447		0.357403	0.304396	0.484018	0.288883	8	0.303258	0.135199	data taken from Picea asperata	1	Yin et al., 2008, Ecological research,23: 459–469
Yin et al. 2008	17	Lixian Station	+ light	n	0.37	soil temperature	102.6	31.58	850	8	17.5	Yin et al., 2008, Ecological research,23: 459–469	Forest	Passive	Woody	1.5	0.117047	1.97	0.116619	8	0.272568	0.00119915		0.99	0.11	1.27	0.1	8	0.249067	0.00231821		0.51	0.04	0.7	0.06	8	0.31667	0.0016873		0.357176	0.177419	0.548441	0.13351	8	0.428852	0.0382499	data taken from Picea asperata	1	Yin et al., 2008, Ecological research,23: 459–469
Yin et al. 2008	17	Lixian Station		n	0.37	soil temperature	102.583	31.58	850	8	17.3	Yin et al., 2008, Ecological research,23: 459–469	Forest	Passive	Woody	2.17	0.116619	3.44	0.183576	8	0.460744	0.000716996		1.52	0.1	2.55	0.16	8	0.517383	0.00103315		0.65	0.06	0.93	0.09	8	0.358212	0.00223574		0.415898	0.144658	0.359369	0.109381	8	-0.146091	0.0267025	data taken from Abies faxoniana	1	Yin et al., 2008, Ecological research,23: 459–469
Yin et al. 2008	17	Lixian Station	+ light	n	0.37	soil temperature	102.6	31.58	850	8	17.3	Yin et al., 2008, Ecological research,23: 459–469	Forest	Passive	Woody	1.75	0.138924	1.84	0.136015	8	0.0501498	0.0014708		1.15	0.12	1.2	0.11	8	0.0425596	0.00241141		0.6	0.07	0.64	0.08	8	0.0645385	0.00365451		0.48746	0.0179552	0.530929	0.176777	8	0.0854214	0.0140271	data taken from Abies faxoniana	1	Yin et al., 2008, Ecological research,23: 459–469
Briones et al. 2009	18	Rigg Foot Hill,UK		n	3.5	soil temperature	-2.08333	55.5	900	8	15	Briones et al., 2009, SBB, 41, 315-322	Grassland	Passive	Herb	284.28	32.9266	387.57	28.4041	3	0.309937	0.00626212		40.16	16.1081	34.14	11.674	3	-0.162402	0.092602		244.15	28.7174	335.43	25.8942	3	0.317631	0.0065981		6.07943	0.621695	9.82513	0.350551	3	0.480032	0.00391017		2	Briones et al., Soil Biology & Biochemistry 41 (2009) 315–322. Table 1
Usami et al. 2008	19	Environmental Research Center of the University of Tsukuba, Japan		n	3	air temperature	140.083	36.08	1255	13.4	22	Author contact	Forest	heated OTC/greenhouse	Woody	87.7	37.8	134.2	36.7	16	0.425409	0.0162851		48	21	79	22	16	0.498247	0.0168099		40	19	56	17	16	0.336472	0.0198613		0.833333	0.64578	0.708861	0.411955	16	-0.161775	0.0586414		1	Usami et al., 2001, Plant Cell and Enviroment, 1007-1019
Usami et al. 2008	19	Environmental Research Center of the University of Tsukuba, Japan		n	5	air temperature	140.083	36.08	1255	13.4	22	Author contact	Forest	heated OTC/greenhouse	Woody	87.7	37.8	128.8	30.2	16	0.384339	0.0150469		48	21	126	26	16	0.965081	0.0146241		40	19	50	16	16	0.223144	0.0205016		0.833333	0.64578	0.396825	0.380762	16	-0.741937	0.0950754		1	Usami et al., 2001, Plant Cell and Enviroment, 1007-1019
Richardson et al. 2002	20	2 km South-east of the Abisko Scientific research station		n	1	soil temperature	19	68	320	-0.6	26.5331	Jonasson et al., 1999, Ecology, 1828-1843, Table 1	Shrubland	Passive	Woody									794.737	242.105	1097.37	194.737	4	0.322659	0.0310736																	data taken from fig. 1a (1999)	9	Richardon et al., 2002, Jouranl of Ecology, 544-566.
Richardson et al. 2002	20	2 km South-east of the Abisko Scientific research station	+nutrients	y	1	soil temperature	19	68	320	-0.6	26.5331	Jonasson et al., 1999, Ecology, 1828-1843, Table 1	Shrubland	Passive	Woody									860.526	136.842	971.053	315.789	4	0.120836	0.0327612																	data taken from fig. 1a (1999)	9	Richardon et al., 2002, Jouranl of Ecology, 544-566.
Clemmensen and Michelsen 2006	21	the summit area of Slottatjokka		n	1.4	soil temperature	18.6833	68.35	300	-0.6	38	Jonasson et al., 1996, 106, 507-515	Shrubland	Passive	Woody									3.70362	3.97851	8.60768	2.89304	6	0.843343	0.211153																		11	Clemmensen et al. Can.J.Bot.84:831-841
Clemmensen and Michelsen 2006	21	the summit area of Slottatjokka	+nutrients	y	1.4	soil temperature	18.6833	68.35	300	-0.6	38	Jonasson et al., 1996, 106, 507-515	Shrubland	Passive	Woody									1.53725	1.92927	18.2519	16.0323	6	2.47428	0.391108																		11	Clemmensen et al. Can.J.Bot.84:831-841
Aerts et al. 2006	22	sub-arctic Sweden near the Abisko Research Station		n	0.88	soil temperature	18.8167	68.35	320	-0.6	26	Sjogersten et al., 2003, Global Change Biology,759-772, Table 3	Shrubland	Passive	Woody									230.174	83.6795	255.008	87.7984	5	0.102463	0.0501416																		2	Aerts et al., Plant Ecology (2006) 182:65 –77
Aerts et al. 2006	22	sub-arctic Sweden near the Abisko Research Station	+ snow fence	n	0.88	soil temperature	18.8167	68.35	320	-0.6	26	Sjogersten et al., 2003, Global Change Biology,759-772, Table 4	Shrubland	Passive	Woody									210.026	83.6812	340.187	69.9613	5	0.482262	0.0402085																		2	Aerts et al., Plant Ecology (2006) 182:65 –77
Aerts et al. 2006	22	sub-arctic Sweden near the Abisko Research Station	+ snow fence	n	0.88	soil temperature	18.8167	68.35	320	-0.6	26	Sjogersten et al., 2003, Global Change Biology,759-772, Table 5	Shrubland	Passive	Woody									210.025	82.3094	310.936	49.3891	5	0.392357	0.0357635																		2	Aerts et al., Plant Ecology (2006) 182:65 –77
Jonasson et al. 1999 (site 1)	23	Abisko		n	0.4	soil temperature	18.8167	68.35	340	-0.6	28.4851	JONASSON et al.,1999.Ecology,1828-1843	Shrubland	Passive	Woody	908.373	410.74	1338.86	352.698	5	0.387921	0.054771		672.387	404.27	939.552	332.362	5	0.334569	0.0973265		235.986	72.6163	399.311	118.031	5	0.525969	0.036412		0.350967	0.675415	0.425001	0.460985	5	0.191401	0.975996	data taken from subarctic heath	4	Jonasson et al., Ecology, 80(6), 1999, pp. 1828–1843
Jonasson et al. 1999 (site 1)	23	Abisko		n	1.5	soil temperature	18.8167	68.35	340	-0.6	28.4851	JONASSON et al.,1999.Ecology,1828-1843	Shrubland	Passive	Woody	908.373	410.74	1528.44	348.491	5	0.520345	0.0512891		672.387	404.27	1165.23	337.649	5	0.549836	0.0890928		235.986	72.6163	363.209	86.2497	5	0.431209	0.0302157		0.350967	0.691646	0.311707	0.374643	5	-0.118628	1.06564	data taken from subarctic heath	4	Jonasson et al., Ecology, 80(6), 1999, pp. 1828–1843
Jonasson et al. 1999 (site 1)	23	Abisko	+ nutrients	y	0.4	soil temperature	18.8167	68.35	340	-0.6	28.4851	JONASSON et al.,1999.Ecology,1828-1843	Shrubland	Passive	Woody	1619.27	199.952	1686.41	208.465	5	0.0406269	0.00610571		1048.23	43.2172	1203.78	123.445	5	0.13837	0.00244318		571.047	195.226	482.63	167.985	5	-0.168221	0.047605		0.544775	0.344351	0.400927	0.362854	5	-0.306592	0.243728	data taken from subarctic heath	4	Jonasson et al., Ecology, 80(6), 1999, pp. 1828–1843
Jonasson et al. 1999 (site 1)	23	Abisko	+nutrients	y	1.5	soil temperature	18.8167	68.35	340	-0.6	28.4851	JONASSON et al.,1999.Ecology,1828-1843	Shrubland	Passive	Woody	1619.27	199.952	2101.11	259.419	5	0.260486	0.00609846		1048.23	43.2172	1634.25	226.151	5	0.444085	0.0041699		571.047	195.226	466.856	127.098	5	-0.201451	0.0381987		0.544775	0.295163	0.28567	0.305394	5	-0.645536	0.287283	data taken from subarctic heath	4	Jonasson et al., Ecology, 80(6), 1999, pp. 1828–1843
Jonasson et al. 1999 (site 2)	23	Abisko		n	1.4	soil temperature	18.8167	68.35	340	-0.6	26.25	JONASSON et al.,1999.Ecology,1828-1843	Shrubland	Passive	Woody	274.629	120.134	420.263	196.082	5	0.425461	0.0818088		251.344	119.941	380.409	195.705	5	0.414425	0.0984779		23.2849	6.80545	39.8541	12.1541	5	0.537423	0.0356849		0.0926415	0.559591	0.104767	0.598057	5	0.122998	13.8146	data taken from subarctic fellfield	4	Jonasson et al., Ecology, 80(6), 1999, pp. 1828–1843
Jonasson et al. 1999 (site 2)	23	Abisko		n	1.35	soil temperature	18.8167	68.35	340	-0.6	26.25	JONASSON et al.,1999.Ecology,1828-1843	Shrubland	Passive	Woody	274.629	120.134	731.166	249.546	5	0.979221	0.0615681		251.344	119.941	699.332	249.375	5	1.0233	0.0709753		23.2849	6.80545	31.8342	9.2382	5	0.312737	0.0339272		0.0926415	0.523389	0.0455208	0.459751	5	-0.710567	26.7848	data taken from subarctic fellfield	4	Jonasson et al., Ecology, 80(6), 1999, pp. 1828–1843
Jonasson et al. 1999 (site 2)	23	Abisko	+ nutrients	y	1.4	soil temperature	18.8167	68.35	340	-0.6	26.25	JONASSON et al.,1999.Ecology,1828-1843	Shrubland	Passive	Woody	597.781	175.849	811.443	360.934	5	0.30559	0.0568776		566.124	175.717	755.172	360.384	5	0.288132	0.0648159		31.6566	6.80545	56.2714	19.9295	5	0.575239	0.03433		0.0559182	0.377565	0.0745147	0.594285	5	0.287107	21.8396	data taken from subarctic fellfield	4	Jonasson et al., Ecology, 80(6), 1999, pp. 1828–1843
Jonasson et al. 1999 (site 2)	23	Abisko	+nutrients	y	1.35	soil temperature	18.8167	68.35	340	-0.6	26.25	JONASSON et al.,1999.Ecology,1828-1843	Shrubland	Passive	Woody	597.781	175.849	748.217	196.09	5	0.224469	0.031044		566.124	175.717	695.833	195.713	5	0.206297	0.0350899		31.6566	6.80545	52.3832	12.1541	5	0.503639	0.0200099		0.0559182	0.397578	0.0752813	0.364615	5	0.297342	14.802	data taken from subarctic fellfield	4	Jonasson et al., Ecology, 80(6), 1999, pp. 1828–1843
Shi et al. 2010	24	Songpan		n	1.53	air temperature	103.55	32.85	717.7	2.8	11.25	Gao Jing et al., 2016,Chinese Journal of Plant Ecology,40: 775-787	Grassland	Passive	Herb	0.86	0.13	0.7	0.04	5	-0.205852	0.0052231		0.68	0.11	0.47	0.1	5	-0.36936	0.0142874		0.18	0.0447214	0.23	0.0894427	5	0.245122	0.0425914		0.63981	0.274604	0.957346	0.443281	5	0.402993	0.0797214	Potentilla anserina	3	Shi et al., 2010, Chinese Journal of Plant Ecology,34 (5): 488–497
Shi et al. 2010	24	Songpan		n	1.53	air temperature	103.55	32.85	717.7	2.8	11.25	Gao Jing et al., 2016,Chinese Journal of Plant Ecology,40: 775-788	Grassland	Passive	Herb	3.08	0.22	3.93	0.34	5	0.24371	0.00251734		1.77	0.17	2	0.52	5	0.122168	0.0153649		1.31	0.290689	1.93	1.76649	5	0.387493	0.177396		0.296419	0.046296	0.551158	0.951494	5	0.620248	0.600939	Rumex acetosa	3	Shi et al., 2010, Chinese Journal of Plant Ecology,34 (5): 488–497
Luo et al. 2009	25	OKlahoma	+clipping	n	2.18	soil temperature	-97.5167	34.98	914	16.3	17.5	Niu et al., 2010, Ecology, 3261-3273, Figure 8	Grassland	Infrared heater	Herb									78.9	21.4774	115.1	24.5951	3	0.37762	0.03992																	Data taken from 2005	6	Luo et al., GCB Bioenergy (2009) 1, 62–74
Hartley et al. 2007	26	University of York, UK		y	3	soil temperature	-1.03333	53.93	601	9.4	8	NA	Cropland	Cable	Herb									2568	444.791	2690	465.922	3	0.0464138	0.02																	maize	1	Hartley et al., Global Change Biology (2007) 13, 2654–2667
Hartley et al. 2007	26	University of York, UK		y	3	soil temperature	-1.03333	53.93	601	9.4	8	NA	Cropland	Cable	Herb									527	91.2791	538	93.1843	3	0.020658	0.02																	wheat	1	Hartley et al., Global Change Biology (2007) 13, 2654–2667
Xu et al. 2009	27	Wanglang		n	0.8	soil temperature	104.133	32.85	796	1.5	12.38	Gao Jing et al., 2016,Chinese Journal of Plant Ecology,40: 775-787	Grassland	Passive	Herb									28.7936	23.5644	41.8566	20.3028	4	0.374096	0.22626																	Deyeuxia scabrescens	1.8	Xu etal.,2009, Acta Ecologica Sinica,29,2899-2905
Xu et al. 2009	27	Wanglang		n	0.8	soil temperature	104.133	32.85	796	1.5	12.38	Gao Jing et al., 2016,Chinese Journal of Plant Ecology,40: 775-787	Grassland	Passive	Herb									13.8825	7.9772	19.3339	14.5016	4	0.331231	0.223196																	Artemisia subdigitata	1.8	Xu etal.,2009, Acta Ecologica Sinica,29,2899-2905
Xu et al. 2009	27	Wanglang		n	0.8	soil temperature	104.133	32.85	796	1.5	12.38	Gao Jing et al., 2016,Chinese Journal of Plant Ecology,40: 775-787	Grassland	Passive	Herb									4.22996	3.98932	4.06134	2.8996	4	-0.0406796	0.349796																	Festuca sinensis	1.8	Xu etal.,2009, Acta Ecologica Sinica,29,2899-2905
Xu et al. 2009	27	Wanglang		n	0.8	soil temperature	104.133	32.85	796	1.5	12.38	Gao Jing et al., 2016,Chinese Journal of Plant Ecology,40: 775-787	Grassland	Passive	Herb									6.17895	2.9003	5.46582	3.62608	4	-0.122634	0.165109																	Others	1.8	Xu etal.,2009, Acta Ecologica Sinica,29,2899-2905
Charles and Dukes 2009	28	Plum Island estuary in Rowley, Massachusetts		n	0.82	air temperature	-70.85	42.72	1157	9.2	12.65	Neff et al., 2002, Nature, 419, 915-917	Salt marsh	Passive	Herb									412	197.221	521	76.5247	5	0.234727	0.0777611																	Data taken from S. alterniflora	1	Charles et al.,Ecological Applications, 19(7), 2009, 1758–1773
Charles and Dukes 2009	28	Plum Island estuary in Rowley, Massachusetts		n	0.82	air temperature	-70.85	42.72	1157	9.2	12.65	Neff et al., 2002, Nature, 419, 915-917	Salt marsh	Passive	Herb									707	280.403	585	114.79	5	-0.189419	0.0670098																	Data taken from S. patens–Distichlis	1	Charles et al.,Ecological Applications, 19(7), 2009, 1758–1774
Boelman et al. 2003	29	LTER site		n	5.6	air temperature	-149.717	68.63	347	-8.5	25	Weintraub et al., 2003, Ecosystems, 6, 129-143	Grassland	Passive	Herb									95.092	20.5773	132.669	15.433	5	0.33301	0.0120716																		13	Boelman et al., Oecologia (2003) 135:414–421
Boelman et al. 2003	29	LTER site	+NP	y	5.6	air temperature	-149.717	68.63	347	-8.5	22	Magill et al., 2004, Forest Ecology and Management, 196 ,7–28	Grassland	Passive	Herb									214.724	46.299	153.374	44.5842	5	-0.336472	0.0261985																		13	Boelman et al., Oecologia (2003) 135:414–421
Hakala 1998	30	Jokioinen in southern Finland		y	3	air temperature	23.5	60.78	644	4.5	9	NA	Cropland	Passive	Herb									1241	124.1	1304	130.4	5	0.049519	0.004																	Data taken from 1994	3	Hakala,European Journal of Agronomy 9 (1998) 41–52
Wang et al. 2012	31	Sichuan		n	2.2	air temperature	103.899	31.7853	919.5	8.6	17.19	Liu et al., 2011, Ecological Research,26: 637–648	Forest	Infrared heater	Woody	339.98	39.6082	415.47	19.8164	6	0.200524	0.00264126		242.61	55.3095	319.13	55.5789	6	0.274143	0.0137174		91.38	15.8482	103.04	11.929	6	0.120091	0.00724691		0.38	0.237482	0.32	0.209126	3	-0.17185	0.272551		5	Wang et al., 2012. Plant Ecol (2012) 213:47–55
Liu 2013	32	Baotian Man		n	1.78	soil temperature	117.783	33.3333	885.6	15.1	13.8	Yanchun Liu's 2013. Phd. Thesis. Chinese Academy of Forest	Forest	Infrared heater	Woody																	2.92091	0.194283	3.83209	0.171494	3	0.271515	0.00214231									data taken from 2012	1	Yanchun Liu's 2013. Phd. Thesis. Chinese Academy of Forest
Liu 2013	32	Baotian Man	+drought	n	1.78	soil temperature	117.783	33.3333	708.48	15.1	13.8	Yanchun Liu's 2013. Phd. Thesis. Chinese Academy of Forest	Forest	Infrared heater	Woody																	4.03303	0.228636	3.09006	0.159997	3	-0.266327	0.00196495									data taken from 2012	1	Yanchun Liu's 2013. Phd. Thesis. Chinese Academy of Forest
Zhao 2009	33	Maoxian Station		n	2.64	soil temperature	102.583	31.58	850	8	17.5	Author contact (Dr. Zheng Jiang)	Forest	Infrared heater	Woody	5.78723	0.442226	6.85106	0.589634	3	0.168749	0.00441541										2.02063	0.142916	2.43903	0.162055	3	0.188191	0.00313903		0.539144	0.0193262	0.550174	0.0193347	3	0.0202527	0.000839987	P.asperata	0.5	Chunzhang Zhao. 2019. Ph.d thesis. Chinese Academy of Science
Zhao 2009	33	Maoxian Station	+N	y	2.64	soil temperature	102.583	31.58	850	8	15.5	Author contact (Dr. Zheng Jiang)	Forest	Infrared heater	Woody	7.48936	0.294817	6.7234	0.589634	3	-0.107889	0.00308022										2.2535	0.159845	2.01845	0.195217	3	-0.110156	0.00479514		0.432836	0.014518	0.438276	0.00970981	3	0.0124881	0.00053862	P.asperata	0.5	Chunzhang Zhao. 2019. Ph.d thesis. Chinese Academy of Science
Zhao 2009	33	Maoxian Station		n	2.64	soil temperature	102.583	31.58	850	8	17.5	Author contact (Dr. Zheng Jiang)	Forest	Infrared heater	Woody	10.0754	0.52347	14.6482	0.522226	3	0.374226	0.00132345										3.19506	0.267035	5.00653	0.248187	3	0.449139	0.00314755		0.473757	0.0179258	0.5202	0.0313485	3	0.0935189	0.00168774	P.tabulaeformis	0.5	Chunzhang Zhao. 2019. Ph.d thesis. Chinese Academy of Science
Zhao 2009	33	Maoxian Station	+N	y	2.64	soil temperature	102.583	31.58	850	8	15.5	Author contact (Dr. Zheng Jiang)	Forest	Infrared heater	Woody	13.9964	0.695058	17.0617	0.52347	3	0.198037	0.0011358										3.97816	0.261441	5.51576	0.361692	3	0.326789	0.00287299		0.403697	0.00895108	0.481174	0.0179179	3	0.175566	0.000626096	P.tabulaeformis	0.5	Chunzhang Zhao. 2019. Ph.d thesis. Chinese Academy of Science
Hoeppner and Dukes 2012	34	BACE		n	1	air temperature	-71.87	42.38	1194	9.5	12.1277	Steinweg et al., 2013, Frontiers in Microbiology,doi: 10.3389/fmicb.2013.00146, Results second paragraph	Grassland	Infrared heater	Herb									407.3	87.6245	377.3	31.3501	3	-0.0765094	0.017729																	data taken from 2010	3	Hoeppener et al., 2012, Global Change Biology,1754–1768
Hoeppner and Dukes 2012	34	BACE		n	2.7	air temperature	-71.87	42.38	1194	9.5	12.1277	Steinweg et al., 2013, Frontiers in Microbiology,doi: 10.3389/fmicb.2013.00147, Results second paragraph	Grassland	Infrared heater	Herb									407.3	87.6245	541.1	42.9549	3	0.284054	0.0175283																	data taken from 2010	3	Hoeppener et al., 2012, Global Change Biology,1754–1768
Hoeppner and Dukes 2012	34	BACE		n	4	air temperature	-71.87	42.38	1194	9.5	12.1277	Steinweg et al., 2013, Frontiers in Microbiology,doi: 10.3389/fmicb.2013.00148, Results second paragraph	Grassland	Infrared heater	Herb									407.3	87.6245	504.6	61.1414	3	0.214216	0.0203216																	data taken from 2010	3	Hoeppener et al., 2012, Global Change Biology,1754–1768
Hoeppner and Dukes 2012	34	BACE	+drought	n	1	air temperature	-71.87	42.38	597	9.5	12.1277	Steinweg et al., 2013, Frontiers in Microbiology,doi: 10.3389/fmicb.2013.00149, Results second paragraph	Grassland	Infrared heater	Herb									438.2	137.698	370.8	240.928	3	-0.167013	0.173641																	data taken from 2010	3	Hoeppener et al., 2012, Global Change Biology,1754–1768
Hoeppner and Dukes 2012	34	BACE	+drought	n	2.7	air temperature	-71.87	42.38	597	9.5	12.1277	Steinweg et al., 2013, Frontiers in Microbiology,doi: 10.3389/fmicb.2013.00150, Results second paragraph	Grassland	Infrared heater	Herb									438.2	137.698	336.5	163.506	3	-0.264077	0.111615																	data taken from 2010	3	Hoeppener et al., 2012, Global Change Biology,1754–1768
Hoeppner and Dukes 2012	34	BACE	+drought	n	4	air temperature	-71.87	42.38	597	9.5	12.1277	Steinweg et al., 2013, Frontiers in Microbiology,doi: 10.3389/fmicb.2013.00151, Results second paragraph	Grassland	Infrared heater	Herb									438.2	137.698	385.9	116.567	3	-0.127097	0.0633292																	data taken from 2010	3	Hoeppener et al., 2012, Global Change Biology,1754–1768
Hoeppner and Dukes 2012	34	BACE	+H2O	n	1	air temperature	-71.87	42.38	1791	9.5	12.1277	Steinweg et al., 2013, Frontiers in Microbiology,doi: 10.3389/fmicb.2013.00152, Results second paragraph	Grassland	Infrared heater	Herb									482.6	213.908	422.7	82.2724	3	-0.132525	0.0781153																	data taken from 2010	3	Hoeppener et al., 2012, Global Change Biology,1754–1768
Hoeppner and Dukes 2012	34	BACE	+H2O	n	2.7	air temperature	-71.87	42.38	1791	9.5	12.1277	Steinweg et al., 2013, Frontiers in Microbiology,doi: 10.3389/fmicb.2013.00153, Results second paragraph	Grassland	Infrared heater	Herb									482.6	213.908	425.7	122.456	3	-0.125453	0.09307																	data taken from 2010	3	Hoeppener et al., 2012, Global Change Biology,1754–1768
Hoeppner and Dukes 2012	34	BACE	+H2O	n	4	air temperature	-71.87	42.38	1791	9.5	12.1277	Steinweg et al., 2013, Frontiers in Microbiology,doi: 10.3389/fmicb.2013.00154, Results second paragraph	Grassland	Infrared heater	Herb									482.6	213.908	439.9	119.858	3	-0.0926407	0.0902336																	data taken from 2010	3	Hoeppener et al., 2012, Global Change Biology,1754–1768
Kostiainen et al. 2009	35	Flakaliden		n	4.2	air temperature	19.17	64.07	600	2.3	37	Hyvonen et al. 2008, Biogeochemistry, 89:121–137	Forest	Infrared heater	Woody									14.25	2.79	20.03	10.21	3	0.340474	0.0993879																		3	KOSTIAINEN et al., 2009. Global Chang Biology.15, 368-379
Lambrecht et al. 2007	36	RMBL		n	1	soil temperature	-106.988	38.9583	750	5	11	Shaw et al., 2001, Global Change Biology, 193-210, Table 1	Grassland	Infrared heater	Herb	0.37	0.011619	0.33	0.11619	15	-0.11441	0.0083302																									Delphinium nuttallianum	3	Lambrecht et al., 2007, New Phytologist ,173: 121–134
Lambrecht et al. 2007	36	RMBL		n	1	soil temperature	-106.988	38.9583	750	5	11	Shaw et al., 2001, Global Change Biology, 193-210, Table 1	Grassland	Infrared heater	Herb	0.5	0.00774597	0.43	0.0193649	15	-0.150823	0.000151208																									Erigeron speciosus	3	Lambrecht et al., 2007, New Phytologist ,173: 121–134
Lambrecht et al. 2007	36	RMBL		n	1	soil temperature	-106.988	38.9583	750	5	11	Shaw et al., 2001, Global Change Biology, 193-210, Table 1	Grassland	Infrared heater	Herb	0.13	0.00387298	0.13	0.00387298	15	0	0.000118343																									Erythronium grandiflorum	3	Lambrecht et al., 2007, New Phytologist ,173: 121–134
Lambrecht et al. 2007	36	RMBL		n	1	soil temperature	-106.988	38.9583	750	5	11	Shaw et al., 2001, Global Change Biology, 193-210, Table 1	Grassland	Infrared heater	Herb	4.04	1.93649	2.67	1.27808	15	-0.414166	0.030593																									Helianthella quinquenervis	3	Lambrecht et al., 2007, New Phytologist ,173: 121–134
Alster et al. 2020	37	Delta Junction		n	0.5	soil temperature	-144.75	63.9167	229.217	-3.9	27.46	Alster et al.,2020. Biogeochemistry. doi: 10.1007/s10533-020-00697-0	Forest	Passive	Woody	2832.72	811.648	2740.94	1142.09	5	-0.0329365	0.0511438		627.46	268.06	967.94	546.719	5	0.43349	0.100308		815.7	594.168	580.2	437.375	5	-0.340674	0.219771		1.3	0.844453	0.599417	0.941964	5	-0.774164	0.578291		13	Alster et al.,2020. Biogeochemistry. doi: 10.1007/s10533-020-00697-0
Malhotra et al. 2020	38	SPRUCE		n	2.25	soil temperature	-93.9	48.8222	768	3.3	45	Malhotra et al., 2020.PNAS. 117,17627–17634	Peatland	Cable	Woody																	131.425	108.576	156.935	21.0647	2	0.177395	0.350267									Average hummock+hallow	3	Malhotra et al., 2020.PNAS. 117,17627–17634
Malhotra et al. 2020	38	SPRUCE		n	4.5	soil temperature	-93.9	48.8222	768	3.3	45	Malhotra et al., 2020.PNAS. 117,17627–17634	Peatland	Cable	Woody																	131.425	108.576	161.615	99.3839	2	0.206781	0.530336									Average hummock+hallow	3	Malhotra et al., 2020.PNAS. 117,17627–17634
Malhotra et al. 2020	38	SPRUCE		n	6.75	soil temperature	-93.9	48.8222	768	3.3	45	Malhotra et al., 2020.PNAS. 117,17627–17634	Peatland	Cable	Woody																	131.425	108.576	177.295	122.916	2	0.299379	0.581582									Average hummock+hallow	3	Malhotra et al., 2020.PNAS. 117,17627–17634
Malhotra et al. 2020	38	SPRUCE		n	9	soil temperature	-93.9	48.8222	768	3.3	45	Malhotra et al., 2020.PNAS. 117,17627–17634	Peatland	Cable	Woody																	131.425	108.576	338.03	15.9948	2	0.944698	0.342378									Average hummock+hallow	3	Malhotra et al., 2020.PNAS. 117,17627–17634
Xu et al. 2015	39	Tibat		n	3	air temperature	92.935	34.8269	267	-5.9	12	Xue et al., 2015, Ecology and Evolution, 4063-4078, Figure 5	Grassland	Infrared heater	Herb																	3082.21	540.495	3171.56	180.206	3	0.0285774	0.0113265										4	Xu et al., 2016, Acta Ecologica Sinica ,6812,6822
Kardol et al. 2010	40	OCCAM	+water	n	1.8	soil temperature	-84.34	35.9	1300	14.2	11.4	Garten Jr et al., 2009. Plant and Soil, 85-94, Table 1	Grassland	Infrared heater	Herb									668	72.7461	694	124.708	3	0.0381838	0.0147165																	Table S1	4	Karodol et al., 2010, Global Change Biology,16, 2676–2687
Kardol et al. 2010	40	OCCAM	+drought	n	1.8	soil temperature	-84.34	35.9	104	14.2	11.4	Garten Jr et al., 2009. Plant and Soil, 85-94, Table 1	Grassland	Infrared heater	Herb									357	183.597	309	46.7654	3	-0.144395	0.0957958																	Table S1	4	Karodol et al., 2010, Global Change Biology,16, 2676–2687
Wang et al. 2019	41	Jingzhou Agro-meteorological Experimental Station		y	2	air temperature	112.15	30.35	1200	16	7.6	Wang et al.2019,Agricultural and Forest Meteorology 278 (2019) 107662	Cropland	heated OTC/greenhouse	Herb									1068.81	35.8606	1145.15	59.8087	3	0.0689867	0.00128449																	Early rice (Data taken from 2016)	4	Wang et al.2019,Agricultural and Forest Meteorology 278 (2019) 107662
Wang et al. 2019	41	Jingzhou Agro-meteorological Experimental Station		y	2	air temperature	112.15	30.35	1201	17	7.6	Wang et al.2019,Agricultural and Forest Meteorology 278 (2019) 107662	Cropland	heated OTC/greenhouse	Herb									1748.23	47.5011	1967.01	71.1794	3	0.117914	0.000682577																	Late rice (Data taken from 2016)	4	Wang et al.2019,Agricultural and Forest Meteorology 278 (2019) 107662
Mueller et al. 2016	42	PHACE		n	2.25	air temperature	-104.9	41.1833	384	17.5	10.44	Dijkstra et al.,2012, New Phytologist,196, 807–815	Grassland	Infrared heater	Herb									67.6018	5.19579	84.3176	10.4246	5	0.220956	0.0042386																		7	Mueller et al., 2016, Ecology Letters, (2016) 19: 956–966
Mueller et al. 2016	42	PHACE		n	2.25	air temperature	-104.9	41.1833	384	17.5	10.44	Dijkstra et al.,2012, New Phytologist,196, 807–815	Grassland	Infrared heater	Herb	441.379	63.6123	420.69	75.1781	5	-0.0480092	0.0105411										357.252	66.57	327.481	56.3284	5	-0.0870114	0.0128616		4.62741	0.462741	3.67876	0.367876	3	-0.229422	0.00666667		6	Mueller et al., 2016, Ecology Letters, (2016) 19: 956–966
Sigurdsson et al. 2013	43	Sweden		n	5	soil temperature	19.45	64.1167	645	2.5	35	Sigurdsson et al., 2013, Tree Physiology 33, 1192–1205	Forest	Passive	Woody									14.3	2.07846	15.5	6.06218	3	0.0805805	0.0580305																		3	Sigurdsson et al., 2013, Tree Physiology 33, 1192–1205
Drebenstedt et al. 2020	44	HoCC		y	2.5	soil temperature	9.19	48.72	729	8.9	9.3	Bamminger et al., 2016, Agriculture , Ecosystmes and Enironment, 308-317, Table 1	Cropland	Cable	Herb									2.34	0.38	3.47	0.75	3	0.394004	0.0243624																		8	Drebenstedt et al.2020. Journal of Applied Botany and Food Quality 93, 44-53
Drebenstedt et al. 2020	44	HoCC	+reduced amount	y	2.5	soil temperature	9.19	48.72	546.75	8.9	9.3	Bamminger et al., 2016, Agriculture , Ecosystmes and Enironment, 308-317, Table 1	Cropland	Cable	Herb									2.71	0.46	4.09	0.79	3	0.411596	0.0220402																		8	Drebenstedt et al.2020. Journal of Applied Botany and Food Quality 93, 44-53
Drebenstedt et al. 2020	44	HoCC	+reduced frenquecy	y	2.5	soil temperature	9.19	48.72	729	8.9	9.3	Bamminger et al., 2016, Agriculture , Ecosystmes and Enironment, 308-317, Table 1	Cropland	Cable	Herb									2.55	1.05655	3.71	1.62813	3	0.374939	0.12142																		8	Drebenstedt et al.2020. Journal of Applied Botany and Food Quality 93, 44-53
Drebenstedt et al. 2020	44	HoCC	+reduce mount and frequency	y	2.5	soil temperature	9.19	48.72	546.75	8.9	9.3	Bamminger et al., 2016, Agriculture , Ecosystmes and Enironment, 308-317, Table 1	Cropland	Cable	Herb									2.61	0.866025	3.63	2.06114	3	0.329882	0.144168																		8	Drebenstedt et al.2020. Journal of Applied Botany and Food Quality 93, 44-53
Xu et al. 2012	45	Oklahoma		n	2	soil temperature	-97.5167	34.98	914	16.3	17.5	Niu et al., 2010, Ecology, 3261-3273, Figure 7	Grassland	Infrared heater	Herb									277.695	6.16969	383.136	56.7468	3	0.321866	0.00747685																	Data taken from 2009	9	Xu et al., 2012.Plant Soil (2012) 361:307–315
Ma et al. 2017	46	Haibei Station (CAS)		n	2	soil temperature	101.2	37.6167	675	-1.1	10.22	Yang xiao xia's phd diseretation	Grassland	Infrared heater	Herb									392.566	45.9754	431.819	41.7979	5	0.0953006	0.00461704																	Data taken from 2015	5	Ma et al., 2017,Nat. Commun. 8, 15378
Ma et al. 2017	46	Haibei Station (CAS)	drought	n	2	soil temperature	101.2	37.6167	337.5	-1.1	10.22	Yang xiao xia's phd diseretation	Grassland	Infrared heater	Herb									364.53	16.7121	377.612	18.804	5	0.0352567	0.000916316																	Data taken from 2015	5	Ma et al., 2017,Nat. Commun. 8, 15378
Ma et al. 2017	46	Haibei Station (CAS)	wet	n	2	soil temperature	101.2	37.6167	1012.5	-1.1	10.22	Yang xiao xia's phd diseretation	Grassland	Infrared heater	Herb									468.267	33.4387	499.11	43.8835	5	0.063788	0.00256597																	Data taken from 2015	5	Ma et al., 2017,Nat. Commun. 8, 15378
Dawes et al. 2015	47	Stillberg		n	3.6	soil temperature	9.86667	46.7667	1155	2.1	25	Bednarz et al., 2000. Arctic. Antarctic, and Alpine Research, 32,21-29.	Forest	Cable	Woody	6782.1	1297.38	6832.14	1235.3	4	0.00735055	0.0173213		3770.51	926.719	3743.32	834.129	4	-0.00723591	0.0275155		2691.68	771.982	2544.42	617.986	4	-0.0562612	0.0353115		0.733877	0.326882	0.649723	0.329612	4	-0.121795	0.11394	Larix decidua	6	Dawes et al., 2015. Global Change Biology 21, 2005–2021
Dawes et al. 2015	47	Stillberg		n	3.6	soil temperature	9.86667	46.7667	1155	2.1	25	Bednarz et al., 2000. Arctic. Antarctic, and Alpine Research, 32,21-29.	Forest	Cable	Woody	5145.29	1105.09	7249.39	1554.03	5	0.342836	0.0184165		2566.2	656.064	4067.91	1105.09	5	0.460702	0.0278318		2244.21	483.642	3101.15	967.036	5	0.323421	0.0287364		0.894526	0.149535	0.732346	0.413568	5	-0.200041	0.0693698	Pinus uncinata	6	Dawes et al., 2015. Global Change Biology 21, 2005–2021
Chen et al. 2016	48	Haibei Grassland Ecological Monitoring Station		n	1.03	soil temperature	100.85	36.95	408.45	1.34	12.5	Auhor contact	Grassland	heated OTC/greenhouse	Herb	2167.81	313.101	2609.58	210.994	6	0.185472	0.00456633		327.119	33.2134	388.136	37.3651	6	0.171032	0.00326276		1840.69	311.335	2221.44	207.659	6	0.188017	0.00622448		5.62698	0.259178	5.72337	0.134186	6	0.0169853	0.000445199	Data taken from 2013	3.5	Chen et al. 2016. Agricultural and Forest Meteorology, 220 ,21–29
Hungate 2014	PC	Jasper Ridge		n	2.25	air temperature	-104.9	41.1833	384	17.5	12.0183	Auhor contact	Grassland	Infrared heater	Herb	682.536	231.759	644.557	188.879	16	-0.0572531	0.012573		443.342	235.968	419.68	187.964	16	-0.0548501	0.0302424		239.194	57.0386	224.877	83.6758	16	-0.0617222	0.0122075		0.539524	0.578832	0.535829	0.582277	16	-0.00687216	0.145744	data taken from 2014	15	Jasper data set
Hungate 2014	PC	Jasper Ridge	+N	y	2.25	air temperature	-104.9	41.1833	384	17.5	10.885	Auhor contact	Grassland	Infrared heater	Herb	959.259	318.537	931.432	259.834	8	-0.0294377	0.023511		699.783	279.068	671.783	230.294	8	-0.0408349	0.0345693		259.477	59.0322	259.65	76.3945	8	0.000667468	0.0172906		0.370796	0.750897	0.386509	0.451758	8	0.0415024	0.683392	data taken from 2014	15	Jasper data set
Hungate 2014	PC	Jasper Ridge	+water	n	2.25	air temperature	-104.9	41.1833	576	17.5	12.0183	Auhor contact	Grassland	Infrared heater	Herb	649.561	262.863	783.781	193.174	8	0.187833	0.0280636		434.236	209.008	487.531	129.144	8	0.115766	0.0377301		215.325	137	296.25	165.146	8	0.319056	0.0894457		0.49587	0.613129	0.607653	0.61719	8	0.20329	0.320062	data taken from 2014	15	Jasper data set
Hungate 2014	PC	Jasper Ridge	+water+N	y	2.25	air temperature	-104.9	41.1833	576	17.5	10.88	Auhor contact	Grassland	Infrared heater	Herb	789.855	249.859	942.258	319.739	8	0.17643	0.0269018		509.169	170.253	711.898	268.633	8	0.335154	0.0317748		280.686	106.607	230.361	77.8618	8	-0.19759	0.0323123		0.551264	0.506025	0.323587	0.506592	8	-0.532744	0.411694	data taken from 2014	15	Jasper data set
Ji 2017	49	Naqu station		n	4.94	air temperature	101.867	33.6667	620	1.2	14.58	Zhang et al., 2020.Environment International 141, 105795	Grassland	Passive	Herb									279.224	57.1255	373.551	76.6748	3	0.291041	0.0279958																		1.5	Yangguang Ji. 2017. Master dissertation for Nanjing agricultural university
Ji 2017	49	Naqu station	+N	y	4.94	air temperature	101.867	33.6667	620	1.2	13.82	Zhang et al., 2020.Environment International 141, 105795	Grassland	Passive	Herb									557.143	76.2927	491.76	37.676	3	-0.124831	0.00820706																		1.5	Yangguang Ji. 2017. Master dissertation for Nanjing agricultural university
Ji 2017	49	Naqu station	+water	n	4.94	air temperature	101.867	33.6667	806	1.2	14.58	Zhang et al., 2020.Environment International 141, 105795	Grassland	Passive	Herb									348.099	62.1579	311.528	47.0968	3	-0.110996	0.0182468																		1.5	Yangguang Ji. 2017. Master dissertation for Nanjing agricultural university
Ji 2017	49	Naqu station	+drought	n	4.94	air temperature	101.867	33.6667	434	1.2	14.58	Zhang et al., 2020.Environment International 141, 105795	Grassland	Passive	Herb									251.602	33.1459	254.556	65.9383	3	0.0116698	0.0281511																		1.5	Yangguang Ji. 2017. Master dissertation for Nanjing agricultural university
Ge et al. 2019	50	Tibet		n	0.81	soil temperature	92.2833	38.35	380	-1	14.5	Author contact	Grassland	Passive	Herb									65.637	4.20717	115.707	2.10265	3	0.566925	0.00147957																		4	Yiqing Ge et al., 2019. Ecology and Environmental Sciences,28(11): 2185-2191
Ge et al. 2019	50	Tibet	+N	y	0.81	soil temperature	92.2833	38.35	380	-1	13.2	Author contact	Grassland	Passive	Herb									137.531	2.94277	113.304	2.52318	3	-0.19377	0.000317917																		4	Yiqing Ge et al., 2019. Ecology and Environmental Sciences,28(11): 2185-2191
Wu 2019	51	SIziwang Qi		n	0.7	soil temperature	111.896	41.7881	311	3.7	7.61628	Zhen Wang et al., 2012.pHD Disertation for Inner MongoliaAgricultural University.Table 2	Grassland	Infrared heater	Herb									28.0143	9.81773	35.668	14.376	3	0.241539	0.0950887																		12	Qian Wu. 2019. Phd disertation for Inner MongoliaAgricultural University
Wu 2019	51	SIziwang Qi	+N	y	0.7	soil temperature	111.896	41.7881	311	3.7	6.29412	Zhen Wang et al., 2012.pHD Disertation for Inner MongoliaAgricultural University.Table 2	Grassland	Infrared heater	Herb									40.6478	24.0421	36.1674	25.1842	3	-0.116786	0.278235																		12	Qian Wu. 2019. Phd disertation for Inner MongoliaAgricultural University
Xiong et al. 2018	52	Chenda Research Station		n	5	soil temperature	117.6	26.3167	1750	19.1	12.2727	Xiong et al.,2018, Soil Biology and Biochemistry ,123,180–189	Forest	Cable	Woody																	176.922	40.4617	181.221	45.5241	5	0.0240083	0.0230816										3	Xiong et al.,2018, Soil Biology and Biochemistry ,123,180–189
Xiong et al. 2018	52	Chenda Research Station	+N	y	5	soil temperature	117.6	26.3167	1750	19.1	11.6	Xiong et al.,2018, Soil Biology and Biochemistry ,123,180–189	Forest	Cable	Woody																	229.976	48.0598	157.354	42.9951	5	-0.379477	0.0236661										3	Xiong et al.,2018, Soil Biology and Biochemistry ,123,180–189
Norby and Childs 2020	53	SPRUCE		n	2.25	soil temperature	-93.9	48.8222	768	3.3	45	Malhotra et al., 2020.PNAS. 117,17627–17634	Peatland	Cable	Woody									387.983	82.9598	352.787	140.336	4	-0.095097	0.0509897																		5	Norby RJ, Childs J. 2018. SPRUCE: Sphagnum Productivity and Community Composition in the SPRUCE Experimental Plots. Oak Ridge National Laboratory, TES SFA, U.S. Department of Energy, Oak Ridge, Tennessee, U.S.A.
Norby and Childs 2020	53	SPRUCE		n	4.5	air temperature	-93.9	48.8222	768	3.3	45	Malhotra et al., 2020.PNAS. 117,17627–17634	Peatland	Cable	Woody									387.983	82.9598	738.552	147.427	4	0.64373	0.0213918																		5	Norby RJ, Childs J. 2018. SPRUCE: Sphagnum Productivity and Community Composition in the SPRUCE Experimental Plots. Oak Ridge National Laboratory, TES SFA, U.S. Department of Energy, Oak Ridge, Tennessee, U.S.A.
Norby and Childs 2020	53	SPRUCE		n	6.75	air temperature	-93.9	48.8222	768	3.3	45	Malhotra et al., 2020.PNAS. 117,17627–17634	Peatland	Cable	Woody									387.983	82.9598	505.415	110.038	4	0.264418	0.0232804																		5	Norby RJ, Childs J. 2018. SPRUCE: Sphagnum Productivity and Community Composition in the SPRUCE Experimental Plots. Oak Ridge National Laboratory, TES SFA, U.S. Department of Energy, Oak Ridge, Tennessee, U.S.A.
Norby and Childs 2020	53	SPRUCE		n	9	air temperature	-93.9	48.8222	768	3.3	45	Malhotra et al., 2020.PNAS. 117,17627–17634	Peatland	Cable	Woody									387.983	82.9598	941.91	55.0191	4	0.886948	0.0122831																		5	Norby RJ, Childs J. 2018. SPRUCE: Sphagnum Productivity and Community Composition in the SPRUCE Experimental Plots. Oak Ridge National Laboratory, TES SFA, U.S. Department of Energy, Oak Ridge, Tennessee, U.S.A.
Zong et al. 2018	54	Damxung County		n	1.6	air temperature	91.06	30.5	477	1.3	12.57	Guan et al., 2018, Plant, Soil and Environment,64: 64-69	Grassland	Passive	Herb	741.017	315.159	742.597	339.365	3	0.00212998	0.129911		169.03	30.321	91.518	16.8291	3	-0.61354	0.0219976		571.987	313.697	651.079	338.948	3	0.129515	0.190599		3.38394	0.577025	7.11421	0.552117	3	0.743054	0.0116999		5	Zong et al., 2018, Chinese Journal of Applied Ecology，Jan． 2018，29( 1) : 59－67
Zong et al. 2018	54	Damxung County	+N	y	1.6	air temperature	91.06	30.5	477	1.3	11.58	Guan et al., 2018, Plant, Soil and Environment,64: 64-69	Grassland	Passive	Herb	867.084	193.335	766.738	491.78	3	-0.122991	0.1537		202.446	43.7217	117.16	47.0849	3	-0.546936	0.0693849		664.638	188.326	649.578	489.52	3	-0.0229192	0.216066		3.28304	0.356272	5.54439	0.854062	3	0.524017	0.011835		5	Zong et al., 2018, Chinese Journal of Applied Ecology，Jan． 2018，29( 1) : 59－67
Zong et al. 2018	54	Damxung County	+N	y	1.6	air temperature	91.06	30.5	477	1.3	10.62	Guan et al., 2018, Plant, Soil and Environment,64: 64-69	Grassland	Passive	Herb	915.837	290.642	785.602	192.067	3	-0.153388	0.0534948		216.437	33.619	144.743	36.9822	3	-0.40234	0.0298029		699.4	288.691	640.859	188.473	3	-0.0874125	0.0856236		3.23142	0.441029	4.42757	0.389581	3	0.314928	0.00878978		5	Zong et al., 2018, Chinese Journal of Applied Ecology，Jan． 2018，29( 1) : 59－67
Dong et al. 2011	55	FATI		y	2	air temperature	118.867	32.0333	1050	16.7	9	SoilGrids2	Cropland	Infrared heater	Herb									18.3	0.242487	16.9	0.484974	3	-0.0795874	0.000333027																		2	Dong et al., 2011.Field Crops Research,123 (2011) 259–265
Wang et al. 2016	56	Changshu		y	2	air temperature	120.55	31.5	1150	16	5.4	SoilGrids2	Cropland	Infrared heater	Herb	13.07	0.11	10.67	0.42	3	-0.202883	0.000540085																										4	Wang et al., 2016, Agriculture, Ecosystems and Environment 221 (2016) 40–49
Wang et al. 2016	56	Changshu		y	2	air temperature	120.55	31.5	1150	16	5.4	SoilGrids2	Cropland	Infrared heater	Herb	20.52	0.42	19.19	0.11	3	-0.0670107	0.000150597																										4	Wang et al., 2016, Agriculture, Ecosystems and Environment 221 (2016) 40–49
Gedan and Bertnes 2010	57	Prudence Island		n	2.6	soil temperature	-71.3786	41.7683	1214.62	23	15.8	SoilGrids2	Salt marsh	Passive	Herb									776.042	198.874	1070.31	220.971	8	0.3215	0.013537																		2	Gedan et al., 2010. Oecologia (2010) 164:479–487
Wang et al. 2018	58	Yangzhou city		y	1	air temperature	119.7	32.5847	1200	16	7.4	SoilGrids2	Cropland	Infrared heater	Herb									1067.95	165.803	717.949	129.534	3	-0.397097	0.0188853																		2	Wang et al., 2018. European Journal of Agronomy 99 (2018) 21–29
Yang et al. 2020	59	Fenghuo Shan		n	2.5	air temperature	92.8333	34.6667	270	-5.3	17.5	from author	Grassland	Passive	Herb																	83.8112	6.47555	108.759	4.62182	3	0.260564	0.00259186										4	Yang et al., 2020. Acta Ecologica Sinica, 40, 6362-6373
Yang et al. 2020	59	Fenghuo Shan		n	2.5	air temperature	92.8333	34.6667	270	-5.3	17.5	from author	Grassland	Passive	Herb																	113.334	11.5608	136.43	9.24864	3	0.185473	0.00500025										4	Yang et al., 2020. Acta Ecologica Sinica, 40, 6362-6373
Fang et al. 2018	60	LanzhouU station		n	2	soil temperature	104.417	36.0333	305	6.5	12.55	SoilGrids2	Grassland	Passive	Herb									95.9827	20.8255	137.809	19.14	5	0.361699	0.0132733																		2	Fang et al., 2018, Agricultural and Forest Meteorology 248,449–457
Fang et al. 2018	60	LanzhouU station	+N	y	2	soil temperature	104.417	36.0333	305	6.5	12.55	SoilGrids2	Grassland	Passive	Herb									177.384	63.6069	215.829	45.5941	5	0.196174	0.0346418																		2	Fang et al., 2018, Agricultural and Forest Meteorology 248 (2018) 449–457
Hutchison and Henry 2010	61	Ontario, Canada		n	2.5	soil temperature	-81.2144	43.0294	818	7.5	18.5606	Henry et al., 2015. Ecosystems ,18,103–114	Grassland	Infrared heater	Herb									813.134	88.4704	1161.11	83.3995	10/20	0.356235	0.00144174																	The sample size of ambient and warming were 10 and 20	2	Hutchison et al., Ecosystems (2010) 13: 661–672
Hutchison and Henry 2010	61	Ontario, Canada	+N	y	2.5	soil temperature	-81.2144	43.0294	818	7.5	18.5606	Henry et al., 2015. Ecosystems ,18,103–114	Grassland	Infrared heater	Herb									1213.93	550.209	1465.59	541.843	10/20	0.188397	0.0273776																		2	Hutchison et al., Ecosystems (2010) 13: 661–672
Rasheed et al. 2020	62	Luke station		n	3.93333	soil temperature	28.0094	64.0678	473	2	13.7255	Rasheed et al., 2020. Science of the Total Environment, 733, 139110	Forest	Infrared heater	Woody	35.3	7.58113	59.14	13.1229	4	0.516025	0.0238402		26.19	6.44	48.54	11.4	4	0.617011	0.0289057		9.11	4	10.6	6.5	4	0.151481	0.142203		0.347843	0.503243	0.218377	0.656644	4	-0.465529	2.78369		3	Rasheed et al., 2020. Science of the Total Environment, 733, 139110
Rasheed et al. 2020	62	Luke station	+N	y	3.93333	soil temperature	28.0094	64.0678	473	2	13.7255	Rasheed et al., 2020. Science of the Total Environment, 733, 139110	Forest	Infrared heater	Woody	72.7	16.0376	68.42	10.1622	4	-0.0606762	0.0176811		51	14.4	50.82	8.48	4	-0.00353565	0.0268916		21.7	7.06	17.6	5.6	4	-0.209413	0.0517724		0.42549	0.430782	0.34632	0.359281	4	-0.205878	0.525319		3	Rasheed et al., 2020. Science of the Total Environment, 733, 139110
Rasheed et al. 2020	62	Luke station	+cliping	n	3.93333	soil temperature	28.0094	64.0678	473	2	13.7255	Rasheed et al., 2020. Science of the Total Environment, 733, 139110	Forest	Infrared heater	Woody	39.66	6.79968	53.25	2.38076	4	0.294655	0.00784843		31.96	6.7	43.34	1.94	4	0.304591	0.0114878		7.7	1.16	9.91	1.38	4	0.252324	0.0105217		0.240926	0.258153	0.228657	0.146271	4	-0.0522669	0.389332		1.5	Rasheed et al., 2020. Science of the Total Environment, 733, 139110
Zhao et al. 2019	63	Nam Co Station		n	1.74	soil temperature	90.9833	30.7667	415	-0.6	8.24752	SoilGrids2	Grassland	Infrared heater	Herb									124.053	43.2039	100.743	30.8777	4	-0.20813	0.0538084																		1	Zhao et al., 2019, Agricultural and Forest Meteorology, 279,107761
Zhao et al. 2019	63	Nam Co Station	+water	n	1.74	soil temperature	90.9833	30.7667	477.25	-0.6	8.24752	SoilGrids2	Grassland	Infrared heater	Herb									143.609	38.5676	103.311	20.0686	4	-0.32935	0.0274647																		1	Zhao et al., 2019, Agricultural and Forest Meteorology, 279,107761
Zhao et al. 2019	63	Nam Co Station	+water	n	1.74	soil temperature	90.9833	30.7667	539.5	-0.6	8.24752	SoilGrids2	Grassland	Infrared heater	Herb									143.868	32.3947	122.864	54.0196	4	-0.15782	0.0610026																		1	Zhao et al., 2019, Agricultural and Forest Meteorology, 279,107761
Wen et al. 2020	64	Beiluhe station		n	2.44	soil temperature	92.9325	34.8261	267.6	-5.9	11.8833	SoilGrids2	Grassland	Infrared heater	Herb									233.074	87.1915	277.112	44.3494	3	0.173067	0.0551864																		8	Jing et al., 2020.J Arid Land,12,252–266
Yu et al. 2019	65	Dam, Tibet		n	1.19	soil temperature	91.0667	30.5167	476	1.83	9.22442	SoilGrids2	Grassland	Passive	Herb									14.3508	0.734708	16.5456	0.980429	3	0.142319	0.00204411																		3.5	Yu et al., 2019,Science of the Total Environment,647,1490–1497
Yu et al. 2019	65	Dam, Tibet		n	2.88	soil temperature	91.0667	30.5167	476	1.83	9.22442	SoilGrids2	Grassland	Passive	Herb									14.3508	0.734708	14.8486	0.613075	3	0.0340984	0.00144194																		3.5	Yu et al., 2019,Science of the Total Environment,647,1490–1497
Yu et al. 2019	65	Dam, Tibet	+water	n	1.19	soil temperature	91.0667	30.5167	547.4	1.83	9.22442	SoilGrids2	Grassland	Passive	Herb									16.407	3.79886	17.9652	1.59289	3	0.0907307	0.0204906																		3.5	Yu et al., 2019,Science of the Total Environment,647,1490–1497
Yu et al. 2019	65	Dam, Tibet	+water	n	2.88	soil temperature	91.0667	30.5167	547.4	1.83	9.22442	SoilGrids2	Grassland	Passive	Herb									16.407	3.79886	16.9051	0.735015	3	0.0299092	0.0185003																		3.5	Yu et al., 2019,Science of the Total Environment,647,1490–1497
Yu et al. 2019	65	Dam, Tibet	+water	n	1.19	soil temperature	91.0667	30.5167	476	1.83	9.22442	SoilGrids2	Grassland	Passive	Herb									18.8171	3.06353	18.6061	0.612768	3	-0.011278	0.00919677																		3.5	Yu et al., 2019,Science of the Total Environment,647,1490–1497
Yu et al. 2019	65	Dam, Tibet	+water	n	2.88	soil temperature	91.0667	30.5167	618.8	1.83	9.22442	SoilGrids2	Grassland	Passive	Herb									18.8171	3.06353	17.051	1.47034	3	-0.0985554	0.0113139																		3.5	Yu et al., 2019,Science of the Total Environment,647,1490–1497
Liu 2019	66	Wayan mountain		n	0.5	soil temperature	100.089	37.7394	587.5	-2.6	11.44	Liujuan's master disertataion	Grassland	Passive	Herb									423.7	73.387	463.26	80.239	3	0.0892628	0.02																		1.5	Liu juan. 2019. Master disertation for Qinghai Normal university
Liu 2019	66	Wayan mountain	+N	y	0.5	soil temperature	100.089	37.7394	587.5	-2.6	10.78	Liujuan's master disertataion	Grassland	Passive	Herb									418.47	72.4811	489.96	84.8636	3	0.157719	0.02																		1.5	Liu juan. 2019. Master disertation for Qinghai Normal university
Yu et al. 2020	67	Bailingmiao		n	3	soil temperature	100.331	41.644	256.4	4.3	7.79809	SoilGrids2	Grassland	Infrared heater	Herb																	1.91	1.40296	0.93	0.969948	3	-0.719674	0.542432										4	Yu et al., 2020,Biogeosciences, 17, 781–792
Yu et al. 2020	67	Bailingmiao		n	4	soil temperature	100.331	41.644	256.4	4.3	7.79809	SoilGrids2	Grassland	Infrared heater	Herb																	1.91	1.40296	1.15	1.00459	3	-0.507341	0.434214										1	Yu et al., 2020,Biogeosciences, 17, 781–792
Li et al. 2018	68	QTP-PE-CAS		n	1.43	soil temperature	92.9325	34.8261	290.9	-3.8	11.8833	SoilGrids2	Grassland	Infrared heater	Herb	2851.38	975.868	2728.69	905.3	3	-0.0439842	0.0757344		264.449	10.7889	276.975	16.1879	3	0.0462795	0.00169343		2586.93	975.809	2451.71	905.156	3	-0.0536876	0.0928629		9.78235	0.278811	8.85173	0.373791	3	-0.0999671	0.00086518		7	Li et al., 2018, Front. Plant Sci. 9:1790.
Li et al. 2018	68	QTP-PE-CAS		n	1.87	soil temperature	92.9325	34.8261	290.9	-3.8	11.8833	SoilGrids2	Grassland	Infrared heater	Herb	1542.23	352.952	1612.44	764.264	3	0.0445194	0.0923441		263.604	14.3934	231.473	17.9912	3	-0.129984	0.00300754		1278.63	352.658	1380.97	764.052	3	0.0769981	0.127394		4.85057	0.857096	5.96601	0.558706	3	0.206982	0.013331		7	Li et al., 2018, Front. Plant Sci. 9:1790.
Cui 2018	69	Fukang station, CAS		n	2.3	soil temperature	87.925	44.6589	150	5.7	20.5	Cui et al., 2017, Science of the Total Environment,601,1280-1288	Desert	Passive	Woody	77.9178	3.18439	85.43	7.99677	3	0.0920425	0.00347745		72.8777	3.11013	73.5423	7.94887	3	0.00907738	0.00450126		5.04012	0.683667	4.57833	0.873893	3	-0.0960965	0.0182777		0.0691586	0.01422	0.0622544	0.0219354	3	-0.105174	0.0554761		2	Cui. 2018. Phd disertation for China Agricultural University
Cui 2018	69	Fukang station, CAS	+N	y	2.3	soil temperature	87.925	44.6589	150	5.7	19.8	Cui et al., 2017, Science of the Total Environment,601,1280-1288	Desert	Passive	Woody	108.585	7.28629	84.3642	6.94521	3	-0.252393	0.00375998		99.0923	7.25763	81.4402	6.91152	3	-0.196183	0.00418884		7.19309	0.645692	6.12405	0.683315	3	-0.160898	0.0068359		0.0725899	0.0115854	0.0751969	0.0140186	3	0.0352851	0.0200756		2	Cui. 2018. Phd disertation for China Agricultural University
Lim et al. 2019	70	Flakaliden		n	5	soil temperature	19.45	64.1167	600	2.4	24.1237	Lim et al. 2019. Nature Climate Change. 9, 49-52	Forest	Cable	Woody	2159	829.348	2594	1116.52	6	0.183556	0.0554708		2010	335.58	2365	396.817	6	0.162643	0.00933778		149	7.34847	229	144.52	6	0.429776	0.0667847		0.0741294	0.0174087	0.0968288	0.0653015	6	0.267132	0.0849949		14	Lim et al. 2019. Nature Climate Change. 9, 49-52
Lim et al. 2019	70	Flakaliden	+N	y	5	soil temperature	19.45	64.1167	600	2.4	23.1325	Lim et al. 2019. Nature Climate Change. 9, 49-52	Forest	Cable	Woody	6921	3327.44	6673	3177.44	6	-0.0364907	0.0763126		6607	1337.42	6310	1276.18	6	-0.045994	0.0136467		314	51.4393	363	51.4393	6	0.14501	0.00781956		0.0475254	0.0260409	0.0575277	0.0246951	6	0.191004	0.0807516		14	Lim et al. 2019. Nature Climate Change. 9, 49-52
Ma et al. 2020	71	Menyuan, China		n	0.6	soil temperature	101.3	37.6833	643	-1.7	10.01	SoilGrids2	Grassland	Passive	Herb	2161.17	214.82	1797.8	689.52	5	-0.184086	0.031396		737.4	104.55	500.28	81.1	5	-0.387963	0.0092763		1423.77	138.2	1297.58	122.37	5	-0.0928073	0.00366311		0.66	0.171825	0.72	0.187545	5	0.0870114	0.0271254		6.5	Ma et al. 2020. Acta Agrestia Sinica.28,1395-1402
Ma et al. 2020	71	Menyuan, China		n	0.98	soil temperature	101.3	37.6833	643	-1.7	10.01	SoilGrids2	Grassland	Passive	Herb	2161.17	214.82	1693.94	287.91	5	-0.243593	0.00775367		737.4	104.55	668.12	121.01	5	-0.0986627	0.0105813		1423.77	138.2	1025.82	215.53	5	-0.327816	0.0107132		0.66	0.171825	0.56	0.277396	5	-0.164303	0.0626299		6.5	Ma et al. 2020. Acta Agrestia Sinica.28,1395-1402
Ma et al. 2020	71	Menyuan, China		n	1.25	soil temperature	101.3	37.6833	643	-1.7	10.01	SoilGrids2	Grassland	Passive	Herb	2161.17	214.82	1822.52	217.44	5	-0.17043	0.00482291		737.4	104.55	613.8	224.52	5	-0.183461	0.0307804		1423.77	138.2	1208.7	239.9	5	-0.163763	0.00976305		0.66	0.171825	0.644	0.416165	5	-0.0245411	0.0970754		6.5	Ma et al. 2020. Acta Agrestia Sinica.28,1395-1402
Ma et al. 2020	71	Menyuan, China		n	1.88	soil temperature	101.3	37.6833	643	-1.7	10.01	SoilGrids2	Grassland	Passive	Herb	2161.17	214.82	1400.54	199.82	5	-0.433792	0.00604721		737.4	104.55	437.32	65.67	5	-0.522465	0.00853031		1423.77	138.2	963.21	150.72	5	-0.390792	0.00678137		0.66	1.32162	0.685	0.216874	5	0.037179	0.822014		6.5	Ma et al. 2020. Acta Agrestia Sinica.28,1395-1402
Li et al. 2021	72	Sichuan		n	3.7	soil temperature	103.2	31.4167	764	11.3	18.2	from author	Forest	Infrared heater	Woody																	1.27	1.66877	1.37	0.933381	8	0.0757938	0.273844										1.3	Li et al. 2020. Journal of Plant Ecology.14:147–159
Li et al. 2021	72	Sichuan	+N	y	3.7	soil temperature	103.2	31.4167	764	11.3	17.15	from author	Forest	Infrared heater	Woody																	2.91	1.89505	1.73	1.15966	8	-0.520032	0.109177										1.3	Li et al. 2020. Journal of Plant Ecology.14:147–159
Yang 2021	73	Heilongjiang		n	1.7	soil temperature	123.767	44.7	430	4.9	15.3	from author	Grassland	Infrared heater	Herb	186.853	40.419	268.131	20.2238	3	0.349898	0.0175367																									Data from 2016	1.5	Yang Xue. 2020. Phd disertation for ENNU
Yang 2021	73	Heilongjiang	+N	y	1.7	soil temperature	123.767	44.7	430	4.9	14.56	from author	Grassland	Infrared heater	Herb	350.177	24.6989	193.005	60.6808	3	-0.575211	0.033283																									Data from 2016	1.5	Yang Xue. 2020. Phd disertation for ENNU
Liu et al. 2021	74	Haibei, Qinghai		n	1.65	soil temperature	101.317	37.6	406.1	-0.79	12.5	Yang X.2014. Disertation for Chinese Academy of Science, Table 2.1	Grassland	Infrared heater	Herb																	710.923	143.961	763.146	128.679	6	0.0708847	0.0115729										4	Liu et al., Plant Soil (2021) 458:59–73
Cao et al. 2020	75	sanming		n	5	soil temperature	117.615	26.3319	1750	19.1	12.2727	Xiong et al.,2018, Soil Biology and Biochemistry ,123,180–189	Forest	Cable	Woody																	99.6	11.1	95	8.3	5	-0.0472853	0.00401068										2.5	Cao et al.,Geoderma 367 (2020) 114273
Cao et al. 2020	75	sanming	+N	y	5	soil temperature	117.615	26.3319	1750	19.1	11.8	from author	Forest	Cable	Woody																	120.7	14.4	110.6	24.8	5	-0.087388	0.0129026										2.5	Cao et al.,Geoderma 367 (2020) 114273
Cao et al. 2020	75	sanming	+N	y	5	soil temperature	117.615	26.3319	1750	19.1	11.6	Xiong et al.,2018, Soil Biology and Biochemistry ,123,180–189	Forest	Cable	Woody																	153	25.3	125.4	18.1	5	-0.198929	0.00963545										2.5	Cao et al.,Geoderma 367 (2020) 114273
Biasi et al. 2008	76	Tazovskiy P		n	0.9	soil temperature	74.8642	67.9364	371.4	-6.6	21	Biasi et al. Plant Soil (2008) 307:191-205	Shrubland	Passive	Woody									833	222.676	1020	276.994	9	0.202524	0.0161339																		2	Biasi et al. Plant Soil (2008) 307:191-205
Salmon et al. 2016	77	Alaska		n	0.7	air temperature	-149.226	63.8831	347.547	-1.415	18.872	SoilGrids2	Grassland	Passive	Herb									585.714	98.9743	533.929	216.506	6	-0.09257	0.0321637																		5	Salmon et al., Global Change Biology (2016) 22, 1927–1941
Salmon et al. 2016	77	Alaska		n	0.5	air temperature	-149.226	63.8831	347.547	-1.415	18.872	SoilGrids2	Grassland	Passive	Herb									585.714	98.9743	732.143	241.25	12	0.223144	0.0114277																		5	Salmon et al., Global Change Biology (2016) 22, 1927–1941
Salmon et al. 2016	77	Alaska		n	0.9	air temperature	-149.226	63.8831	347.547	-1.415	18.872	SoilGrids2	Grassland	Passive	Herb									585.714	98.9743	644.643	191.763	12	0.0958643	0.00975364																		5	Salmon et al., Global Change Biology (2016) 22, 1927–1941
Gill 2014	78	GBER		n	1.5	air temperature	-111.5	39.2833	902	1.7	12.908	Gill. Plant Soil (2014) 374:197–210	Grassland	Passive	Herb									234.383	98.7893	236.32	83.293	4	0.0082305	0.0754698																		3	Gill. Plant Soil (2014) 374:197–210
Gill 2014	78	GBER	+grazing	n	1.5	air temperature	-111.5	39.2833	902	1.7	11.4171	Gill. Plant Soil (2014) 374:197–210	Grassland	Passive	Herb									134.625	32.9298	161.743	50.3632	4	0.18352	0.0391968																		3	Gill. Plant Soil (2014) 374:197–210
Gill 2014	78	GBER	+N	y	1.5	air temperature	-111.5	39.2833	902	1.7	12.3331	Gill. Plant Soil (2014) 374:197–210	Grassland	Passive	Herb									221.792	52.3002	304.116	110.412	4	0.315671	0.046854																		3	Gill. Plant Soil (2014) 374:197–210
Gill 2014	78	GBER	+grazing+N	y	1.5	air temperature	-111.5	39.2833	902	1.7	11.4304	Gill. Plant Soil (2014) 374:197–210	Grassland	Passive	Herb									187.893	44.5521	224.697	69.7337	4	0.178879	0.0381342																		3	Gill. Plant Soil (2014) 374:197–210
Yoshitake et al. 2015	79	Takayama		n	2	soil temperature	137.417	36.1333	2128	7.1	16.2184	Yoshitake et al., Ecol Res (2015) 30: 235–245	Grassland	Infrared heater	Herb									125	30	193	24	5	0.434376																		Data taken from 2010	2	Yoshitake et al., Ecol Res (2015) 30: 235–245
Ylänne et al. 2020	80	Raisduoddar	low grazing	n	1.7	soil temperature	21.3211	69.5247	872.343	-4.2	27.5411	Henni et al.Ecological Monographs, 90(1), 2020, e01396	Shrubland	Passive	Woody									434.357	116.112	417.19	113.293	3	-0.0403249	0.0484018																		5	YLANNE Ecological Monographs, 90(1), 2020, e01396
Ylänne et al. 2020	80	Raisduoddar	high grazing	n	1.7	soil temperature	21.3211	69.5247	872.343	-4.2	19.741	Henni et al.Ecological Monographs, 90(1), 2020, e01396	Shrubland	Passive	Woody									171.552	45.8589	237.937	64.6147	3	0.32712	0.0484018																		5	YLANNE Ecological Monographs, 90(1), 2020, e01396
Ylänne et al. 2020	80	Raisduoddar	grazing excluded	n	1.7	soil temperature	21.3211	69.5247	872.343	-4.2	20.9253	Henni et al.Ecological Monographs, 90(1), 2020, e01396	Shrubland	Passive	Woody									237.69	63.5389	266.506	72.373	3	0.114427	0.0484018																		5	YLANNE Ecological Monographs, 90(1), 2020, e01396
Ylänne et al. 2020	80	Raisduoddar	low grazing+N	y	1.7	soil temperature	21.3211	69.5247	872.343	-4.2	25.5165	Henni et al.Ecological Monographs, 90(1), 2020, e01396	Shrubland	Passive	Woody									395.485	105.72	381.318	103.552	3	-0.0364787	0.0484018																		5	YLANNE Ecological Monographs, 90(1), 2020, e01396
Ylänne et al. 2020	80	Raisduoddar	high grazing+N	y	1.7	soil temperature	21.3211	69.5247	872.343	-4.2	19.8894	Henni et al.Ecological Monographs, 90(1), 2020, e01396	Shrubland	Passive	Woody									223.74	59.8097	194.534	52.8283	3	-0.139876	0.0484018																		5	YLANNE Ecological Monographs, 90(1), 2020, e01396
Ylänne et al. 2020	80	Raisduoddar	grazing exluded+N	y	1.7	soil temperature	21.3211	69.5247	872.343	-4.2	21.5096	Henni et al.Ecological Monographs, 90(1), 2020, e01397	Shrubland	Passive	Woody									157.411	42.0787	243.764	66.1973	3	0.437344	0.0484018																		5	YLANNE Ecological Monographs, 90(1), 2020, e01396
Fu et al. 2017	81	Hailun station	+N	y	2.76	soil temperature	126.633	47.4333	552	1.5	14.32	Fu et al., 2017, Chinese Journal of Ecology，36, 601－608	Cropland	Infrared heater	Herb	271.017	206.745	483.51	337.368	3	0.578889	0.356265		224.15	204.623	430.647	336.198	3	0.652973	0.48094		46.8669	29.5484	52.8624	28.0772	3	0.120381	0.226535		0.209087	0.209266	0.122751	0.136038	3	-0.532592	0.538607	Figure 6	2	Fu et al., 2017, Chinese Journal of Ecology，36, 601－608
Sardans et al. 2008	82	Catalonia		n	0.95	soil temperature	1.81667	41.3	580	15.1	17.6	Sardans et al. Global Change Biology (2008) 14, 2304–2316	Shrubland	Passive	Woody									958	954.36	1447	1383.91	3	0.4124	0.40703																		6	Sardans et al. Global Change Biology (2008) 14, 2304–2316
Sardans et al. 2008	82	Catalonia		n	0.95	soil temperature	1.81667	41.3	580	15.1	17.6	Sardans et al. Global Change Biology (2008) 14, 2304–2316	Shrubland	Passive	Woody									1025	299.645	1083	1056.55	3	0.0550424	0.1078																		6	Sardans et al. Global Change Biology (2008) 14, 2304–2316
Holmstrup et al. 2013	83	Clocaenog		n	0.3	soil temperature	-3.47	53.06	1215	7.1	14.7194	SoilGrids2	Shrubland	Passive	Woody																	98.8	12.2976	86.5	18.3597	3	-0.132953	0.0201811									Clocaenog	13	Holmstrup et al., 2013, Soil Biology & Biochemistry, 110-118
Holmstrup et al. 2013	83	Clocaenog		n	0.3	soil temperature	-3.47	53.06	1215	7.1	14.7194	SoilGrids2	Shrubland	Passive	Woody																	105.9	36.7195	61.8	24.4219	3	-0.538592	0.0921304									Oldebroek	13	Holmstrup et al., 2013, Soil Biology & Biochemistry, 110-118
Holmstrup et al. 2013	83	Clocaenog		n	0.3	soil temperature	-3.47	53.06	1215	7.1	14.7194	SoilGrids2	Shrubland	Passive	Woody																	266.5	55.0792	275.3	33.6018	3	0.0324872	0.0192042									Mols	13	Holmstrup et al., 2013, Soil Biology & Biochemistry, 110-118
Andresen et al. 2010	84	Brandbjer		n	1	soil temperature	11.97	55.88	603	8.2	19.16	Carter et al.,2011,Soil Biogeochemistry and Biology, 1660-1670, Materials and Method	Shrubland	Passive	Herb	616.183	405.833	417.831	173.928	6	-0.388467																										Deschampsia	2	Andresen et al., 2010, Biogeochemistry, 27-42
Andresen et al. 2010	84	Brandbjer	+drought	n	1	soil temperature	11.97	55.88	603	8.2	19.16	Carter et al.,2011,Soil Biogeochemistry and Biology, 1660-1670, Materials and Method	Shrubland	Passive	Herb	440.121	231.549	324.681	173.573	6	-0.304204																										Deschampsia	2	Andresen et al., 2010, Biogeochemistry, 27-42
Andresen et al. 2010	84	Brandbjer		n	1	soil temperature	11.97	55.88	603	8.2	19.16	Carter et al.,2011,Soil Biogeochemistry and Biology, 1660-1670, Materials and Method	Shrubland	Passive	Woody	888.268	637.94	1104.31	695.739	6	0.2177											44.1718	39.6727	92.7607	36.0661	6	0.741937	0.15964									Calluna	2	Andresen et al., 2010, Biogeochemistry, 27-42
Andresen et al. 2010	84	Brandbjer	+drought	n	1	soil temperature	11.97	55.88	603	8.2	19.16	Carter et al.,2011,Soil Biogeochemistry and Biology, 1660-1670, Materials and Method	Shrubland	Passive	Woody	1304.03	521.804	1366.14	638.121	6	0.0465328											85.3988	64.919	139.877	108.198	6	0.493434	0.196037									Calluna	2	Andresen et al., 2010, Biogeochemistry, 27-42
Gorissen et al. 2004 (Site 1)	85	UK		n	1.25	soil temperature	-3.46667	53.05	1741	8.2	14.7194	SoilGrids2	Shrubland	Passive	Woody	119.1	25.7228	123.9	27.4401	3	0.0395113	0.0318983		37.2	9.94423	33.6	9.12451	3	-0.101783	0.0484018		81.9	23.5703	90.3	25.86	3	0.0976385	0.054946		2.20161	2.2035	2.6875	2.97841	3	0.199421	0.743308	data taken from UK	2	Gorissen et al., 2004, Ecosystems (2004) 7: 650–661
Gorissen et al. 2004 (Site 2)	85	DK		n	1.25	soil temperature	10.95	56.3833	758	9.4	20.0384	SoilGrids2	Shrubland	Passive	Woody	70.4	15.2047	83	18.382	2	0.164647	0.0478474		25.2	6.73642	29.9	8.11973	2	0.171014	0.0726027		45.2	13.0083	53.1	15.2067	2	0.16108	0.082419		1.79365	1.79519	1.77592	1.96816	2	-0.00993464	1.11496	data taken from DK	2	Gorissen et al., 2004, Ecosystems (2004) 7: 650–661
Gorissen et al. 2004 (Site 3)	85	ES		n	1.25	soil temperature	1.81667	41.3	455	15.1	14.1829	SoilGrids2	Shrubland	Passive	Woody	137.3	29.6536	117.4	26.0006	3	-0.156581	0.0318983		58.6	15.6648	43	11.6772	3	-0.309535	0.0484018		78.7	22.6494	74.4	21.3065	3	-0.0561872	0.054946		1.343	1.34415	1.73023	1.91752	3	0.253347	0.743308	data taken from ES	2	Gorissen et al., 2004, Ecosystems (2004) 7: 650–661
Fang et al. 2015	86	Gucheng station		y	2.55	soil temperature	115.67	39.13	543	12.7	15.7126	Fang et al., 2012, Science China,1021-1027, Materials and Method	Cropland	Infrared heater	Herb									1201.01	69.4926	1527.83	214.795	3	0.240683	0.00770439																	Data takn from both day and nithgt warming (Figure 3b)	3	Fang et al., 2015, Europ. J. Agronomy 64 (2015) 67–77
Fang et al. 2015	86	Gucheng station		y	2.55	soil temperature	115.67	39.13	543	12.7	15.7126	Fang et al., 2012, Science China,1021-1027, Materials and Method	Cropland	Infrared heater	Herb									1201.01	69.4926	1348.86	260.465	3	0.116097	0.0135452																	Data takn from nithgt warming (Figure 3b)	3	Fang et al., 2015, Europ. J. Agronomy 64 (2015) 67–77
[truncated: 5 more columns]

## Sheet: WarmingNitrogenTotal
Study	Reference NO.	Experiment name	Treatment	Nitrogen	Tdelta	Note (temperature type)	Long	Lat	MAP	MAT	SCN	Ecosystems	Warming method	Vegetation type	Total-Biomass.control	Csd	Total-Biomass.warmed	Tsd	n	RR	Variance (v)	Duration	Data source	Species-1	Species-2	Species-3	Mycorrhizal Type
Zhang et al. 2015	3	Songnen Grassland Ecological Research Station		n	1.75	soil temperature	123.75	44.75	400	5.2	8.54459	Grassland	Infrared heater	Herb	305.853	37.5316	247.893	42.2216	6	-0.210109	0.00734459	3.3	Figure 5	Stipa baicalensis	Leymus chinensis	Artemisia frigida	AM
Zhang et al. 2015	3	Songnen Grassland Ecological Research Station	+N	y	0.58	soil temperature	123.75	44.75	400	5.2	7.31239	Grassland	Infrared heater	Herb	335.857	16.7001	351.399	119.642	6	0.0452389	0.0197324	3.3	Figure 5	Stipa baicalensis	Leymus chinensis	Artemisia frigida	AM
Li et al. 2013	8	Duolun County		n	1.79	soil temperature	116.28	42.03	382.3	2.1	9.48	Grassland	Infrared heater	Herb	1092.63	422.241	991.79	303.467	3	-0.0968315	0.0809874	3.5	Table 1	Stipa krylovii Roshev	Artemisia frigida Willd	Potentilla acaulis L.,	AM
Li et al. 2013	8	Duolun County	+N	y	1.79	soil temperature	116.28	42.03	382.3	2.1	8.94	Grassland	Infrared heater	Herb	1326.32	269.846	1120.84	295.626	3	-0.16833	0.0369866	3.5	Table 1	Stipa krylovii Roshev	Artemisia frigida Willd	Potentilla acaulis L.,	AM
Jonasson et al. 1999 (site 1)	23	Abisko		n	0.4	soil temperature	18.8167	68.35	340	-0.6	28.4851	Shrubland	Passive	Woody	908.373	410.74	1338.86	352.698	5	0.387921	0.054771	4	Figure 3 & 4	Cassiope tetragona (L.) D. Don	Betula pubescens		ECM
Jonasson et al. 1999 (site 1)	23	Abisko		n	1.5	soil temperature	18.8167	68.35	340	-0.6	28.4851	Shrubland	Passive	Woody	908.373	410.74	1528.44	348.491	5	0.520345	0.0512891	4	Figure 3 & 4	Cassiope tetragona (L.) D. Don	Betula pubescens		ECM
Jonasson et al. 1999 (site 1)	23	Abisko	+ nutrients	y	0.4	soil temperature	18.8167	68.35	340	-0.6	28.4851	Shrubland	Passive	Woody	1619.27	199.952	1686.41	208.465	5	0.0406269	0.00610571	4	Figure 3 & 4	Cassiope tetragona (L.) D. Don	Betula pubescens		ECM
Jonasson et al. 1999 (site 1)	23	Abisko	+nutrients	y	1.5	soil temperature	18.8167	68.35	340	-0.6	28.4851	Shrubland	Passive	Woody	1619.27	199.952	2101.11	259.419	5	0.260486	0.00609846	4	Figure 3 & 4	Cassiope tetragona (L.) D. Don	Betula pubescens		ECM
Jonasson et al. 1999 (site 2)	23	Abisko		n	1.4	soil temperature	18.8167	68.35	340	-0.6	26.25	Shrubland	Passive	Woody	274.629	120.134	420.263	196.082	5	0.425461	0.0818088	4	Figure 3 & 4	Cassiope tetragona (L.) D. Don	Betula pubescens		ECM
Jonasson et al. 1999 (site 2)	23	Abisko		n	1.35	soil temperature	18.8167	68.35	340	-0.6	26.25	Shrubland	Passive	Woody	274.629	120.134	731.166	249.546	5	0.979221	0.0615681	4	Figure 3 & 4	Cassiope tetragona (L.) D. Don	Betula pubescens		ECM
Jonasson et al. 1999 (site 2)	23	Abisko	+ nutrients	y	1.4	soil temperature	18.8167	68.35	340	-0.6	26.25	Shrubland	Passive	Woody	597.781	175.849	811.443	360.934	5	0.30559	0.0568776	4	Figure 3 & 4	Cassiope tetragona (L.) D. Don	Betula pubescens		ECM
Jonasson et al. 1999 (site 2)	23	Abisko	+nutrients	y	1.35	soil temperature	18.8167	68.35	340	-0.6	26.25	Shrubland	Passive	Woody	597.781	175.849	748.217	196.09	5	0.224469	0.031044	4	Figure 3 & 4	Cassiope tetragona (L.) D. Don	Betula pubescens		ECM
Zhao 2009	33	Maoxian Station		n	2.64	soil temperature	102.583	31.58	850	8	17.5	Forest	Infrared heater	Woody	5.78723	0.442226	6.85106	0.589634	3	0.168749	0.00441541	0.5	Figure 5-1	Betula albo-sinensis	Abies faxoniana		ECM
Zhao 2009	33	Maoxian Station	+N	y	2.64	soil temperature	102.583	31.58	850	8	15.5	Forest	Infrared heater	Woody	7.48936	0.294817	6.7234	0.589634	3	-0.107889	0.00308022	0.5	Figure 5-1	Betula albo-sinensis	Abies faxoniana		ECM
Zhao 2009	33	Maoxian Station		n	2.64	soil temperature	102.583	31.58	850	8	17.5	Forest	Infrared heater	Woody	10.0754	0.52347	14.6482	0.522226	3	0.374226	0.00132345	0.5	Figure 5-1	Betula albo-sinensis	Abies faxoniana		ECM
Zhao 2009	33	Maoxian Station	+N	y	2.64	soil temperature	102.583	31.58	850	8	15.5	Forest	Infrared heater	Woody	13.9964	0.695058	17.0617	0.52347	3	0.198037	0.0011358	0.5	Figure 5-1	Betula albo-sinensis	Abies faxoniana		ECM
Hungate 2014	PC	Jasper Ridge		n	2.25	air temperature	-104.9	41.1833	384	17.5	12.0183	Grassland	Infrared heater	Herb	682.536	231.759	644.557	188.879	16	-0.0572531	0.012573	15	Jasper data set	Pascopyrum smthii	Hesperostipa comata	Bouteloua gracilis	AM
Hungate 2014	PC	Jasper Ridge	+N	y	2.25	air temperature	-104.9	41.1833	384	17.5	10.885	Grassland	Infrared heater	Herb	959.259	318.537	931.432	259.834	8	-0.0294377	0.023511	15	Jasper data set	Pascopyrum smthii	Hesperostipa comata	Bouteloua gracilis	AM
Hungate 2014	PC	Jasper Ridge	+water	n	2.25	air temperature	-104.9	41.1833	576	17.5	12.0183	Grassland	Infrared heater	Herb	649.561	262.863	783.781	193.174	8	0.187833	0.0280636	15	Jasper data set	Pascopyrum smthii	Hesperostipa comata	Bouteloua gracilis	AM
Hungate 2014	PC	Jasper Ridge	+water+N	y	2.25	air temperature	-104.9	41.1833	576	17.5	10.88	Grassland	Infrared heater	Herb	789.855	249.859	942.258	319.739	8	0.17643	0.0269018	15	Jasper data set	Pascopyrum smthii	Hesperostipa comata	Bouteloua gracilis	AM
Zong et al. 2018	54	Damxung County		n	1.6	air temperature	91.06	30.5	477	1.3	12.57	Grassland	Passive	Herb	741.017	315.159	742.597	339.365	3	0.00212998	0.129911	5		Kobresia pygmaea	Kobresia pygmaea		AM
Zong et al. 2018	54	Damxung County	+N	y	1.6	air temperature	91.06	30.5	477	1.3	11.58	Grassland	Passive	Herb	867.084	193.335	766.738	491.78	3	-0.122991	0.1537	5		Carex montis-everestii	Carex montis-everestii		AM
Zong et al. 2018	54	Damxung County	+N	y	1.6	air temperature	91.06	30.5	477	1.3	10.62	Grassland	Passive	Herb	915.837	290.642	785.602	192.067	3	-0.153388	0.0534948	5		Carex montis-everestii	Carex montis-everestii		AM
Rasheed et al. 2020	62	Luke station		n	3.93333	soil temperature	28.0094	64.0678	473	2	13.7255	Forest	Infrared heater	Woody	35.3	7.58113	59.14	13.1229	4	0.516025	0.0238402	3	Table 1		Hylobius abietis L.	Pinus sylvestris	ECM
Rasheed et al. 2020	62	Luke station	+N	y	3.93333	soil temperature	28.0094	64.0678	473	2	13.7255	Forest	Infrared heater	Woody	72.7	16.0376	68.42	10.1622	4	-0.0606762	0.0176811	3	Table 1		Hylobius abietis L.	Pinus sylvestris	ECM
Cui 2018	69	Fukang station, CAS		n	2.3	soil temperature	87.925	44.6589	150	5.7	20.5	Desert	Passive	Woody	77.9178	3.18439	85.43	7.99677	3	0.0920425	0.00347745	2	Figure 2-16-18	H. ammodendron	Haloxylon persicum		AM
Cui 2018	69	Fukang station, CAS	+N	y	2.3	soil temperature	87.925	44.6589	150	5.7	19.8	Desert	Passive	Woody	108.585	7.28629	84.3642	6.94521	3	-0.252393	0.00375998	2	Figure 2-16-18	H. ammodendron	Haloxylon persicum		AM
Lim et al. 2019	70	Flakaliden		n	5	soil temperature	19.45	64.1167	600	2.4	24.1237	Forest	Cable	Woody	2159	829.348	2594	1116.52	6	0.183556	0.0554708	14	Table S2	Picea abies L. Karst.			ECM
Lim et al. 2019	70	Flakaliden	+N	y	5	soil temperature	19.45	64.1167	600	2.4	23.1325	Forest	Cable	Woody	6921	3327.44	6673	3177.44	6	-0.0364907	0.0763126	14	Table S2	Picea abies L. Karst.			ECM
Yang 2021	73	Heilongjiang		n	1.7	soil temperature	123.767	44.7	430	4.9	15.3	Grassland	Infrared heater	Herb	186.853	40.419	268.131	20.2238	3	0.349898	0.0175367	1.5	Figure 6-3	Leymus chinensis			AM
Yang 2021	73	Heilongjiang	+N	y	1.7	soil temperature	123.767	44.7	430	4.9	14.56	Grassland	Infrared heater	Herb	350.177	24.6989	193.005	60.6808	3	-0.575211	0.033283	1.5	Figure 6-3	Leymus chinensis			AM

## Sheet: WarmingNitrogenAboveground
Study	Reference NO.	Experiment name	Treatment	Nitrogen	Tdelta	Note (temperature type)	Long	Lat	MAP	MAT	SCN	Ecosystems	Warming method	Vegetation type	Aboveground -Biomass.control	Csd	Aboveground-Biomass.warmed	Tsd	n	RR	Variance (v)	Duration	Data source	Species-1	Species-2	Species-3	Mycorrhizal Type
Zhang et al. 2015	3	Songnen Grassland Ecological Research Station		n	1.75	soil temperature	123.75	44.75	400	5.2	8.54459	Grassland	Infrared heater	Herb	282.313	37.4922	221.088	41.658	6	-0.244453	0.00885663	3.3	Figure 5	Stipa baicalensis	Leymus chinensis	Artemisia frigida	AM
Zhang et al. 2015	3	Songnen Grassland Ecological Research Station	+N	y	0.58	soil temperature	123.75	44.75	400	5.2	7.31239	Grassland	Infrared heater	Herb	309.541	15.5788	324.382	119.444	6	0.0468313	0.02302	3.3	Figure 5	Stipa baicalensis	Leymus chinensis	Artemisia frigida	AM
Li et al. 2013	8	Duolun County		n	1.79	soil temperature	116.28	42.03	382.3	2.1	9.48	Grassland	Infrared heater	Herb	120.75	11.65	116.54	13.86	3	-0.0354877	0.00781753	3.5	Table 1	Stipa krylovii Roshev	Artemisia frigida Willd	Potentilla acaulis L.,	AM
Li et al. 2013	8	Duolun County	+N	y	1.79	soil temperature	116.28	42.03	382.3	2.1	8.94	Grassland	Infrared heater	Herb	126.74	5.97	142.89	11.29	3	0.119937	0.00282056	3.5	Table 1	Stipa krylovii Roshev	Artemisia frigida Willd	Potentilla acaulis L.,	AM
Richardson et al. 2002	20	2 km South-east of the Abisko Scientific research station		n	1	soil temperature	19	68	320	-0.6	26.5331	Shrubland	Passive	Woody	794.737	242.105	1097.37	194.737	4	0.322659	0.0310736	9	Figure 1	Empetrum nigrum ssp.hermaphroditum	Vaccinium		ECM
Richardson et al. 2002	20	2 km South-east of the Abisko Scientific research station	+nutrients	y	1	soil temperature	19	68	320	-0.6	26.5331	Shrubland	Passive	Woody	860.526	136.842	971.053	315.789	4	0.120836	0.0327612	9	Figure 1	Empetrum nigrum ssp.hermaphroditum	Vaccinium		ECM
Clemmensen and Michelsen 2006	21	the summit area of Slottatjokka		n	1.4	soil temperature	18.6833	68.35	300	-0.6	38	Shrubland	Passive	Woody	3.70362	3.97851	8.60768	2.89304	6	0.843343	0.211153	11	Figure 1	Willow			ECM
Clemmensen and Michelsen 2006	21	the summit area of Slottatjokka	+nutrients	y	1.4	soil temperature	18.6833	68.35	300	-0.6	38	Shrubland	Passive	Woody	1.53725	1.92927	18.2519	16.0323	6	2.47428	0.391108	11	Figure 1	Willow			ECM
Jonasson et al. 1999 (site 1)	23	Abisko		n	0.4	soil temperature	18.8167	68.35	340	-0.6	28.4851	Shrubland	Passive	Woody	672.387	404.27	939.552	332.362	5	0.334569	0.0973265	4	Figure 3 & 4	Cassiope tetragona (L.) D. Don	Betula pubescens		ECM
Jonasson et al. 1999 (site 1)	23	Abisko		n	1.5	soil temperature	18.8167	68.35	340	-0.6	28.4851	Shrubland	Passive	Woody	672.387	404.27	1165.23	337.649	5	0.549836	0.0890928	4	Figure 3 & 4	Cassiope tetragona (L.) D. Don	Betula pubescens		ECM
Jonasson et al. 1999 (site 1)	23	Abisko	+ nutrients	y	0.4	soil temperature	18.8167	68.35	340	-0.6	28.4851	Shrubland	Passive	Woody	1048.23	43.2172	1203.78	123.445	5	0.13837	0.00244318	4	Figure 3 & 4	Cassiope tetragona (L.) D. Don	Betula pubescens		ECM
Jonasson et al. 1999 (site 1)	23	Abisko	+nutrients	y	1.5	soil temperature	18.8167	68.35	340	-0.6	28.4851	Shrubland	Passive	Woody	1048.23	43.2172	1634.25	226.151	5	0.444085	0.0041699	4	Figure 3 & 4	Cassiope tetragona (L.) D. Don	Betula pubescens		ECM
Jonasson et al. 1999 (site 2)	23	Abisko		n	1.4	soil temperature	18.8167	68.35	340	-0.6	26.25	Shrubland	Passive	Woody	251.344	119.941	380.409	195.705	5	0.414425	0.0984779	4	Figure 3 & 4	Cassiope tetragona (L.) D. Don	Betula pubescens		ECM
Jonasson et al. 1999 (site 2)	23	Abisko		n	1.35	soil temperature	18.8167	68.35	340	-0.6	26.25	Shrubland	Passive	Woody	251.344	119.941	699.332	249.375	5	1.0233	0.0709753	4	Figure 3 & 4	Cassiope tetragona (L.) D. Don	Betula pubescens		ECM
Jonasson et al. 1999 (site 2)	23	Abisko	+ nutrients	y	1.4	soil temperature	18.8167	68.35	340	-0.6	26.25	Shrubland	Passive	Woody	566.124	175.717	755.172	360.384	5	0.288132	0.0648159	4	Figure 3 & 4	Cassiope tetragona (L.) D. Don	Betula pubescens		ECM
Jonasson et al. 1999 (site 2)	23	Abisko	+nutrients	y	1.35	soil temperature	18.8167	68.35	340	-0.6	26.25	Shrubland	Passive	Woody	566.124	175.717	695.833	195.713	5	0.206297	0.0350899	4	Figure 3 & 4	Cassiope tetragona (L.) D. Don	Betula pubescens		ECM
Boelman et al. 2003	29	LTER site		n	5.6	air temperature	-149.717	68.63	347	-8.5	25	Grassland	Passive	Herb	95.092	20.5773	132.669	15.433	5	0.33301	0.0120716	13	Figure 1		Carex	Eriophorum	AM
Boelman et al. 2003	29	LTER site	+NP	y	5.6	air temperature	-149.717	68.63	347	-8.5	22	Grassland	Passive	Herb	214.724	46.299	153.374	44.5842	5	-0.336472	0.0261985	13	Figure 1		Carex	Eriophorum	AM
Hungate 2014	PC	Jasper Ridge		n	2.25	air temperature	-104.9	41.1833	384	17.5	12.0183	Grassland	Infrared heater	Herb	443.342	235.968	419.68	187.964	16	-0.0548501	0.0302424	15	Jasper data set	Pascopyrum smthii	Hesperostipa comata	Bouteloua gracilis	AM
Hungate 2014	PC	Jasper Ridge	+N	y	2.25	air temperature	-104.9	41.1833	384	17.5	10.885	Grassland	Infrared heater	Herb	699.783	279.068	671.783	230.294	8	-0.0408349	0.0345693	15	Jasper data set	Pascopyrum smthii	Hesperostipa comata	Bouteloua gracilis	AM
Hungate 2014	PC	Jasper Ridge	+water	n	2.25	air temperature	-104.9	41.1833	576	17.5	12.0183	Grassland	Infrared heater	Herb	434.236	209.008	487.531	129.144	8	0.115766	0.0377301	15	Jasper data set	Pascopyrum smthii	Hesperostipa comata	Bouteloua gracilis	AM
Hungate 2014	PC	Jasper Ridge	+water+N	y	2.25	air temperature	-104.9	41.1833	576	17.5	10.88	Grassland	Infrared heater	Herb	509.169	170.253	711.898	268.633	8	0.335154	0.0317748	15	Jasper data set	Pascopyrum smthii	Hesperostipa comata	Bouteloua gracilis	AM
Ji 2017	49	Naqu station		n	4.94	air temperature	101.867	33.6667	620	1.2	14.58	Grassland	Passive	Herb	279.224	57.1255	373.551	76.6748	3	0.291041	0.0279958	1.5	Figure 6-2	Kobresia eapillifol	Stipaalien		AM
Ji 2017	49	Naqu station	+N	y	4.94	air temperature	101.867	33.6667	620	1.2	13.82	Grassland	Passive	Herb	557.143	76.2927	491.76	37.676	3	-0.124831	0.00820706	1.5	Figure 6-2	Kobresia eapillifol	Stipaalien		AM
Ge et al. 2019	50	Tibet		n	0.81	soil temperature	92.2833	38.35	380	-1	14.5	Grassland	Passive	Herb	65.637	4.20717	115.707	2.10265	3	0.566925	0.00147957	4	Figure 1	Kobresia pygmaea	Carex moorcroftii		AM
Ge et al. 2019	50	Tibet	+N	y	0.81	soil temperature	92.2833	38.35	380	-1	13.2	Grassland	Passive	Herb	137.531	2.94277	113.304	2.52318	3	-0.19377	0.000317917	4	Figure 1	Kobresia pygmaea	Carex moorcroftii		AM
Wu 2019	51	SIziwang Qi		n	0.7	soil temperature	111.896	41.7881	311	3.7	7.61628	Grassland	Infrared heater	Herb	28.0143	9.81773	35.668	14.376	3	0.241539	0.0950887	12	Figure 16	Stipa breviflora	Cleistogenes songorica		AM
Wu 2019	51	SIziwang Qi	+N	y	0.7	soil temperature	111.896	41.7881	311	3.7	6.29412	Grassland	Infrared heater	Herb	40.6478	24.0421	36.1674	25.1842	3	-0.116786	0.278235	12	Figure 16	Stipa breviflora	Cleistogenes songorica		AM
Zong et al. 2018	54	Damxung County		n	1.6	air temperature	91.06	30.5	477	1.3	12.57	Grassland	Passive	Herb	169.03	30.321	91.518	16.8291	3	-0.61354	0.0219976	5		Kobresia pygmaea	Kobresia pygmaea		AM
Zong et al. 2018	54	Damxung County	+N	y	1.6	air temperature	91.06	30.5	477	1.3	11.58	Grassland	Passive	Herb	202.446	43.7217	117.16	47.0849	3	-0.546936	0.0693849	5		Carex montis-everestii	Carex montis-everestii		AM
Zong et al. 2018	54	Damxung County	+N	y	1.6	air temperature	91.06	30.5	477	1.3	10.62	Grassland	Passive	Herb	216.437	33.619	144.743	36.9822	3	-0.40234	0.0298029	5		Carex montis-everestii	Carex montis-everestii		AM
Fang et al. 2018	60	LanzhouU station		n	2	soil temperature	104.417	36.0333	305	6.5	12.55	Grassland	Passive	Herb	95.9827	20.8255	137.809	19.14	5	0.361699	0.0132733	2	Figure A2		Melilotus suaveolens L.		AM
Fang et al. 2018	60	LanzhouU station	+N	y	2	soil temperature	104.417	36.0333	305	6.5	12.55	Grassland	Passive	Herb	177.384	63.6069	215.829	45.5941	5	0.196174	0.0346418	2	Figure A2		Melilotus suaveolens L.		AM
Hutchison and Henry 2010	61	Ontario, Canada		n	2.5	soil temperature	-81.2144	43.0294	818	7.5	18.5606	Grassland	Infrared heater	Herb	813.134	88.4704	1161.11	83.3995	10/20	0.356235	0.00144174	2	Figure 3	Bromus inermis	Aster ericoides L.		AM
Hutchison and Henry 2010	61	Ontario, Canada	+N	y	2.5	soil temperature	-81.2144	43.0294	818	7.5	18.5606	Grassland	Infrared heater	Herb	1213.93	550.209	1465.59	541.843	10/20	0.188397	0.0273776	2	Figure 3	Bromus inermis	Aster ericoides L.		AM
Rasheed et al. 2020	62	Luke station		n	3.93333	soil temperature	28.0094	64.0678	473	2	13.7255	Forest	Infrared heater	Woody	26.19	6.44	48.54	11.4	4	0.617011	0.0289057	3	Table 1		Hylobius abietis L.	Pinus sylvestris	ECM
Rasheed et al. 2020	62	Luke station	+N	y	3.93333	soil temperature	28.0094	64.0678	473	2	13.7255	Forest	Infrared heater	Woody	51	14.4	50.82	8.48	4	-0.00353565	0.0268916	3	Table 1		Hylobius abietis L.	Pinus sylvestris	ECM
Liu 2019	66	Wayan mountain		n	0.5	soil temperature	100.089	37.7394	587.5	-2.6	11.44	Grassland	Passive	Herb	423.7	73.387	463.26	80.239	3	0.0892628	0.02	1.5	Figure 4-2	Kobresia humilis			AM
Liu 2019	66	Wayan mountain	+N	y	0.5	soil temperature	100.089	37.7394	587.5	-2.6	10.78	Grassland	Passive	Herb	418.47	72.4811	489.96	84.8636	3	0.157719	0.02	1.5	Figure 4-2	Kobresia humilis			AM
Cui 2018	69	Fukang station, CAS		n	2.3	soil temperature	87.925	44.6589	150	5.7	20.5	Desert	Passive	Woody	72.8777	3.11013	73.5423	7.94887	3	0.00907738	0.00450126	2	Figure 2-16-18	H. ammodendron	Haloxylon persicum		AM
Cui 2018	69	Fukang station, CAS	+N	y	2.3	soil temperature	87.925	44.6589	150	5.7	19.8	Desert	Passive	Woody	99.0923	7.25763	81.4402	6.91152	3	-0.196183	0.00418884	2	Figure 2-16-18	H. ammodendron	Haloxylon persicum		AM
Lim et al. 2019	70	Flakaliden		n	5	soil temperature	19.45	64.1167	600	2.4	24.1237	Forest	Cable	Woody	2010	335.58	2365	396.817	6	0.162643	0.00933778	14	Table S2	Picea abies L. Karst.			ECM
Lim et al. 2019	70	Flakaliden	+N	y	5	soil temperature	19.45	64.1167	600	2.4	23.1325	Forest	Cable	Woody	6607	1337.42	6310	1276.18	6	-0.045994	0.0136467	14	Table S2	Picea abies L. Karst.			ECM
Gill 2014	78	GBER		n	1.5	air temperature	-111.5	39.2833	902	1.7	12.908	Grassland	Passive	Herb	234.383	98.7893	236.32	83.293	4	0.0082305	0.0754698	3	Figure 2	Achnatherum lettermanii	Achnatherum lettermanii		AM
Gill 2014	78	GBER	+grazing	n	1.5	air temperature	-111.5	39.2833	902	1.7	11.4171	Grassland	Passive	Herb	134.625	32.9298	161.743	50.3632	4	0.18352	0.0391968	3	Figure 2	Achnatherum lettermanii	Achnatherum lettermanii		AM
Gill 2014	78	GBER	+N	y	1.5	air temperature	-111.5	39.2833	902	1.7	12.3331	Grassland	Passive	Herb	221.792	52.3002	304.116	110.412	4	0.315671	0.046854	3	Figure 2	Achnatherum lettermanii	Achnatherum lettermanii		AM
Gill 2014	78	GBER	+grazing+N	y	1.5	air temperature	-111.5	39.2833	902	1.7	11.4304	Grassland	Passive	Herb	187.893	44.5521	224.697	69.7337	4	0.178879	0.0381342	3	Figure 2	Achnatherum lettermanii	Achnatherum lettermanii		AM
Ylänne et al. 2020	80	Raisduoddar	low grazing	n	1.7	soil temperature	21.3211	69.5247	872.343	-4.2	27.5411	Shrubland	Passive	Woody	434.357	116.112	417.19	113.293	3	-0.0403249	0.0484018	5	Figure 3	Betula nana			ECM
Ylänne et al. 2020	80	Raisduoddar	high grazing	n	1.7	soil temperature	21.3211	69.5247	872.343	-4.2	19.741	Shrubland	Passive	Woody	171.552	45.8589	237.937	64.6147	3	0.32712	0.0484018	5	Figure 3	Betula nana			ECM
Ylänne et al. 2020	80	Raisduoddar	grazing excluded	n	1.7	soil temperature	21.3211	69.5247	872.343	-4.2	20.9253	Shrubland	Passive	Woody	237.69	63.5389	266.506	72.373	3	0.114427	0.0484018	5	Figure 3	Betula nana			ECM
Ylänne et al. 2020	80	Raisduoddar	low grazing+N	y	1.7	soil temperature	21.3211	69.5247	872.343	-4.2	25.5165	Shrubland	Passive	Woody	395.485	105.72	381.318	103.552	3	-0.0364787	0.0484018	5	Figure 3	Betula nana			ECM
Ylänne et al. 2020	80	Raisduoddar	high grazing+N	y	1.7	soil temperature	21.3211	69.5247	872.343	-4.2	19.8894	Shrubland	Passive	Woody	223.74	59.8097	194.534	52.8283	3	-0.139876	0.0484018	5	Figure 3	Betula nana			ECM
Ylänne et al. 2020	80	Raisduoddar	grazing exluded+N	y	1.7	soil temperature	21.3211	69.5247	872.343	-4.2	21.5096	Shrubland	Passive	Woody	157.411	42.0787	243.764	66.1973	3	0.437344	0.0484018	5	Figure 3	Betula nana			ECM

## Sheet: WarmingNitrogenBelowground
Study	Reference NO.	Experiment name	Treatment	Nitrogen	Tdelta	Note (temperature type)	Long	Lat	MAP	MAT	SCN	Ecosystems	Warming method	Vegetation type	Belowground-Biomass.control	Csd	Belowground-Biomass.warmed	Tsd	n	RR	Variance (v)	Duration	Data source	Species-1	Species-2	Species-3	Mycorrhizal Type
Zhang et al. 2015	3	Songnen Grassland Ecological Research Station		n	1.75	soil temperature	123.75	44.75	400	5.2	8.54459	Grassland	Infrared heater	Herb	21.7544	1.71881	23.1579	6.87572	6	0.0625199	0.0157326	3.3	Figure 5	Stipa baicalensis	Leymus chinensis	Artemisia frigida	AM
Zhang et al. 2015	3	Songnen Grassland Ecological Research Station	+N	y	0.58	soil temperature	123.75	44.75	400	5.2	7.31239	Grassland	Infrared heater	Herb	26.3158	6.01619	27.0175	6.87596	6	0.0263153	0.0195059	3.3	Figure 5	Stipa baicalensis	Leymus chinensis	Artemisia frigida	AM
Graham et al. 2014	6	Cass Warming Experiment		n	3	soil temperature	171.75	-43.03	1300	10	13.2424	Grassland	Cable	Herb	389	114.039	454	60.3738	5	0.154518	0.0207255	3	Table 1	Festuca novae-zelandiae	Chionochloa rigida	Chionochloa flavescens	AM
Graham et al. 2014	6	Cass Warming Experiment	+N	y	3	soil temperature	171.75	-43.03	1300	10	12.5429	Grassland	Cable	Herb	518	185.594	482	67.082	5	-0.0720311	0.0295481	3	Table 1	Festuca novae-zelandiae	Chionochloa rigida	Chionochloa flavescens	AM
Li et al. 2013	8	Duolun County		n	1.79	soil temperature	116.28	42.03	382.3	2.1	9.48	Grassland	Infrared heater	Herb	971.88	422.08	875.25	303.15	3	-0.104723	0.102858	3.5	Table 1	Stipa krylovii Roshev	Artemisia frigida Willd	Potentilla acaulis L.,	AM
Li et al. 2013	8	Duolun County	+N	y	1.79	soil temperature	116.28	42.03	382.3	2.1	8.94	Grassland	Infrared heater	Herb	1199.58	269.78	977.95	295.41	3	-0.204268	0.0472749	3.5	Table 1	Stipa krylovii Roshev	Artemisia frigida Willd	Potentilla acaulis L.,	AM
Jonasson et al. 1999 (site 1)	23	Abisko		n	0.4	soil temperature	18.8167	68.35	340	-0.6	28.4851	Shrubland	Passive	Woody	235.986	72.6163	399.311	118.031	5	0.525969	0.036412	4	Figure 3 & 4	Cassiope tetragona (L.) D. Don	Betula pubescens		ECM
Jonasson et al. 1999 (site 1)	23	Abisko		n	1.5	soil temperature	18.8167	68.35	340	-0.6	28.4851	Shrubland	Passive	Woody	235.986	72.6163	363.209	86.2497	5	0.431209	0.0302157	4	Figure 3 & 4	Cassiope tetragona (L.) D. Don	Betula pubescens		ECM
Jonasson et al. 1999 (site 1)	23	Abisko	+ nutrients	y	0.4	soil temperature	18.8167	68.35	340	-0.6	28.4851	Shrubland	Passive	Woody	571.047	195.226	482.63	167.985	5	-0.168221	0.047605	4	Figure 3 & 4	Cassiope tetragona (L.) D. Don	Betula pubescens		ECM
Jonasson et al. 1999 (site 1)	23	Abisko	+nutrients	y	1.5	soil temperature	18.8167	68.35	340	-0.6	28.4851	Shrubland	Passive	Woody	571.047	195.226	466.856	127.098	5	-0.201451	0.0381987	4	Figure 3 & 4	Cassiope tetragona (L.) D. Don	Betula pubescens		ECM
Jonasson et al. 1999 (site 2)	23	Abisko		n	1.4	soil temperature	18.8167	68.35	340	-0.6	26.25	Shrubland	Passive	Woody	23.2849	6.80545	39.8541	12.1541	5	0.537423	0.0356849	4	Figure 3 & 4	Cassiope tetragona (L.) D. Don	Betula pubescens		ECM
Jonasson et al. 1999 (site 2)	23	Abisko		n	1.35	soil temperature	18.8167	68.35	340	-0.6	26.25	Shrubland	Passive	Woody	23.2849	6.80545	31.8342	9.2382	5	0.312737	0.0339272	4	Figure 3 & 4	Cassiope tetragona (L.) D. Don	Betula pubescens		ECM
Jonasson et al. 1999 (site 2)	23	Abisko	+ nutrients	y	1.4	soil temperature	18.8167	68.35	340	-0.6	26.25	Shrubland	Passive	Woody	31.6566	6.80545	56.2714	19.9295	5	0.575239	0.03433	4	Figure 3 & 4	Cassiope tetragona (L.) D. Don	Betula pubescens		ECM
Jonasson et al. 1999 (site 2)	23	Abisko	+nutrients	y	1.35	soil temperature	18.8167	68.35	340	-0.6	26.25	Shrubland	Passive	Woody	31.6566	6.80545	52.3832	12.1541	5	0.503639	0.0200099	4	Figure 3 & 4	Cassiope tetragona (L.) D. Don	Betula pubescens		ECM
Zhao 2009	33	Maoxian Station		n	2.64	soil temperature	102.583	31.58	850	8	17.5	Forest	Infrared heater	Woody	2.02063	0.142916	2.43903	0.162055	3	0.188191	0.00313903	0.5	Figure 5-1	Betula albo-sinensis	Abies faxoniana		ECM
Zhao 2009	33	Maoxian Station	+N	y	2.64	soil temperature	102.583	31.58	850	8	15.5	Forest	Infrared heater	Woody	2.2535	0.159845	2.01845	0.195217	3	-0.110156	0.00479514	0.5	Figure 5-1	Betula albo-sinensis	Abies faxoniana		ECM
Zhao 2009	33	Maoxian Station		n	2.64	soil temperature	102.583	31.58	850	8	17.5	Forest	Infrared heater	Woody	3.19506	0.267035	5.00653	0.248187	3	0.449139	0.00314755	0.5	Figure 5-1	Betula albo-sinensis	Abies faxoniana		ECM
Zhao 2009	33	Maoxian Station	+N	y	2.64	soil temperature	102.583	31.58	850	8	15.5	Forest	Infrared heater	Woody	3.97816	0.261441	5.51576	0.361692	3	0.326789	0.00287299	0.5	Figure 5-1	Betula albo-sinensis	Abies faxoniana		ECM
Hungate 2014	PC	Jasper Ridge		n	2.25	air temperature	-104.9	41.1833	384	17.5	12.0183	Grassland	Infrared heater	Herb	239.194	57.0386	224.877	83.6758	16	-0.0617222	0.0122075	15	Jasper data set	Pascopyrum smthii	Hesperostipa comata	Bouteloua gracilis	AM
Hungate 2014	PC	Jasper Ridge	+N	y	2.25	air temperature	-104.9	41.1833	384	17.5	10.885	Grassland	Infrared heater	Herb	259.477	59.0322	259.65	76.3945	8	0.000667468	0.0172906	15	Jasper data set	Pascopyrum smthii	Hesperostipa comata	Bouteloua gracilis	AM
Hungate 2014	PC	Jasper Ridge	+water	n	2.25	air temperature	-104.9	41.1833	576	17.5	12.0183	Grassland	Infrared heater	Herb	215.325	137	296.25	165.146	8	0.319056	0.0894457	15	Jasper data set	Pascopyrum smthii	Hesperostipa comata	Bouteloua gracilis	AM
Hungate 2014	PC	Jasper Ridge	+water+N	y	2.25	air temperature	-104.9	41.1833	576	17.5	10.88	Grassland	Infrared heater	Herb	280.686	106.607	230.361	77.8618	8	-0.19759	0.0323123	15	Jasper data set	Pascopyrum smthii	Hesperostipa comata	Bouteloua gracilis	AM
Xiong et al. 2018	52	Chenda Research Station		n	5	soil temperature	117.6	26.3167	1750	19.1	12.2727	Forest	Cable	Woody	176.922	40.4617	181.221	45.5241	5	0.0240083	0.0230816	3	Figure 6	Cunninghamia lanceolata			AM
Xiong et al. 2018	52	Chenda Research Station	+N	y	5	soil temperature	117.6	26.3167	1750	19.1	11.6	Forest	Cable	Woody	229.976	48.0598	157.354	42.9951	5	-0.379477	0.0236661	3	Figure 6	Cunninghamia lanceolata			AM
Zong et al. 2018	54	Damxung County		n	1.6	air temperature	91.06	30.5	477	1.3	12.57	Grassland	Passive	Herb	571.987	313.697	651.079	338.948	3	0.129515	0.190599	5		Kobresia pygmaea	Kobresia pygmaea		AM
Zong et al. 2018	54	Damxung County	+N	y	1.6	air temperature	91.06	30.5	477	1.3	11.58	Grassland	Passive	Herb	664.638	188.326	649.578	489.52	3	-0.0229192	0.216066	5		Carex montis-everestii	Carex montis-everestii		AM
Zong et al. 2018	54	Damxung County	+N	y	1.6	air temperature	91.06	30.5	477	1.3	10.62	Grassland	Passive	Herb	699.4	288.691	640.859	188.473	3	-0.0874125	0.0856236	5		Carex montis-everestii	Carex montis-everestii		AM
Rasheed et al. 2020	62	Luke station		n	3.93333	soil temperature	28.0094	64.0678	473	2	13.7255	Forest	Infrared heater	Woody	9.11	4	10.6	6.5	4	0.151481	0.142203	3	Table 1		Hylobius abietis L.	Pinus sylvestris	ECM
Rasheed et al. 2020	62	Luke station	+N	y	3.93333	soil temperature	28.0094	64.0678	473	2	13.7255	Forest	Infrared heater	Woody	21.7	7.06	17.6	5.6	4	-0.209413	0.0517724	3	Table 1		Hylobius abietis L.	Pinus sylvestris	ECM
Cui 2018	69	Fukang station, CAS		n	2.3	soil temperature	87.925	44.6589	150	5.7	20.5	Desert	Passive	Woody	5.04012	0.683667	4.57833	0.873893	3	-0.0960965	0.0182777	2	Figure 2-16-18	H. ammodendron	Haloxylon persicum		AM
Cui 2018	69	Fukang station, CAS	+N	y	2.3	soil temperature	87.925	44.6589	150	5.7	19.8	Desert	Passive	Woody	7.19309	0.645692	6.12405	0.683315	3	-0.160898	0.0068359	2	Figure 2-16-18	H. ammodendron	Haloxylon persicum		AM
Lim et al. 2019	70	Flakaliden		n	5	soil temperature	19.45	64.1167	600	2.4	24.1237	Forest	Cable	Woody	149	7.34847	229	144.52	6	0.429776	0.0667847	14	Table S2	Picea abies L. Karst.			ECM
Lim et al. 2019	70	Flakaliden	+N	y	5	soil temperature	19.45	64.1167	600	2.4	23.1325	Forest	Cable	Woody	314	51.4393	363	51.4393	6	0.14501	0.00781956	14	Table S2	Picea abies L. Karst.			ECM
Li et al. 2021	72	Sichuan		n	3.7	soil temperature	103.2	31.4167	764	11.3	18.2	Forest	Infrared heater	Woody	1.27	1.66877	1.37	0.933381	8	0.0757938	0.273844	1.3	Table 1	Picea asperata			ECM
Li et al. 2021	72	Sichuan	+N	y	3.7	soil temperature	103.2	31.4167	764	11.3	17.15	Forest	Infrared heater	Woody	2.91	1.89505	1.73	1.15966	8	-0.520032	0.109177	1.3	Table 1	Picea asperata			ECM
Cao et al. 2020	75	sanming		n	5	soil temperature	117.615	26.3319	1750	19.1	12.2727	Forest	Cable	Woody	99.6	11.1	95	8.3	5	-0.0472853	0.00401068	2.5	Table 1	Cunninghamia lanceolata			AM
Cao et al. 2020	75	sanming	+N	y	5	soil temperature	117.615	26.3319	1750	19.1	11.8	Forest	Cable	Woody	120.7	14.4	110.6	24.8	5	-0.087388	0.0129026	2.5	Table 1	Cunninghamia lanceolata			AM
Cao et al. 2020	75	sanming	+N	y	5	soil temperature	117.615	26.3319	1750	19.1	11.6	Forest	Cable	Woody	153	25.3	125.4	18.1	5	-0.198929	0.00963545	2.5	Table 1	Cunninghamia lanceolata			AM
